# Supplementary material for: Selective fluorescence sensing of salicylic acids using a simple pyrenesulfonamide receptor
Source: Royal Society of Chemistry journal article supplement (doi:10.1039/c5ra00565e), 2015-01-01
Supplement: c5ra00565e1.pdf [file c5ra00565e1.pdf]

## ESI

# Selective Fluorescence Sensing of Salicylic Acids Using a Simple Pyrenesulfonamide Receptor

Ashwani Kumar <sup>a</sup>, Manik Kumer Ghosh <sup>b</sup>, Cheol-Ho Choi <sup>b</sup> and Hong-Seok Kim <sup>a\*</sup>

<sup>a</sup>*Department of Applied Chemistry, Kyungpook National University, Daegu 702-701,*

<sup>b</sup>*Department of Chemistry, and Green-Nano Materials Research Center, College of Natural Sciences, Kyungpook National University, Daegu 702-701,*

*Republic of Korea*

*Corresponding author: Tel.: +82 53 9505588; fax: +82 53 9506594.*

*E-mail address: [kimhs@knu.ac.kr](mailto:kimhs@knu.ac.kr)*

### Table of Contents

|     |                                                                |       |
|-----|----------------------------------------------------------------|-------|
| 1.  | <sup>1</sup> H NMR of probe <b>2</b> in CDCl <sub>3</sub> .    | 4-5   |
| 2.  | <sup>13</sup> C NMR of probe <b>2</b> in CDCl <sub>3</sub> .   | 6     |
| 3.  | HRMS of probe <b>2</b> .                                       | 7-8   |
| 4.  | <sup>1</sup> H NMR of probe <b>3</b> in DMSO-d <sub>6</sub> .  | 9-11  |
| 5.  | <sup>13</sup> C NMR of probe <b>3</b> in DMSO-d <sub>6</sub> . | 12    |
| 6.  | HRMS of probe <b>3</b> .                                       | 13-14 |
| 7.  | <sup>1</sup> H NMR of probe <b>4</b> in DMSO-d <sub>6</sub> .  | 15-17 |
| 8.  | <sup>13</sup> C NMR of probe <b>4</b> in DMSO-d <sub>6</sub> . | 18    |
| 9.  | HRMS of probe <b>4</b> .                                       | 19-20 |
| 10. | <sup>1</sup> H NMR of probe <b>5</b> in CDCl <sub>3</sub> .    | 21-22 |
| 11. | <sup>13</sup> C NMR of probe <b>5</b> in CDCl <sub>3</sub> .   | 23    |

12. HRMS of probe **5**. 24-25
13. Fig. SI 1: Fluorescence study of probe **2** (1  $\mu$ M, EtOH) with different salicylic derivatives/similar moieties,  $\lambda_{ex} = 336$  nm, slit width 3,3. 26
14. Fig. SI 2: Fluorescence titration of probe **2** (1  $\mu$ M, EtOH) with 3,5-Dinitrosalicylic acid,  $\lambda_{ex} = 336$  nm, slit width 3,3. 26-27
- Fig. SI 3: Fluorescence spectral fitting of probe **2** (1  $\mu$ M, EtOH) with [3,5-Dinitrosalicylic Acid] at 379 nm and association constant.
15. Fig. SI 4: Relative fluorescence intensity bar diagram of probe **3** (1  $\mu$ M, EtOH) with different aromatic carboxylic acids,  $\lambda_{ex} = 336$  nm. 27
16. Fig. SI 5: Relative fluorescence bar diagram of probe **4** (1  $\mu$ M, EtOH) with different carboxylic acids,  $\lambda_{ex} = 336$  nm. 28
17. Fig. SI 6: Relative fluorescence bar diagram of probe **5** (1  $\mu$ M, EtOH) with different carboxylic acids,  $\lambda_{ex} = 336$  nm. 28
18. Fig. SI 7: Partial  $^1\text{H}$  NMR spectra of aromatic region of 5-NSA and probe **3** on addition of 1 eq. of 5-NSA in DMSO- $d_6$ . 29
- Fig. SI 8: Partial  $^1\text{H}$  NMR spectra of aliphatic region of 5-NSA and probe **3** on addition of 1 eq. of 5-NSA in DMSO- $d_6$ .
19. Fig. SI 9: Partial  $^1\text{H}$  NMR spectra of aromatic region of 5-ISA and probe **3** on addition of 1 eq. of 5-ISA, 2 eq. of 5-ISA in DMSO- $d_6$ . 30
- Fig. SI 10: Partial  $^1\text{H}$  NMR spectra of aliphatic region 5-ISA and probe **3** on addition of 1 eq. of 5-ISA, 2 eq. of 5-ISA in DMSO- $d_6$ .

- 20.** Fig. SI 11: Partial  $^1\text{H}$  NMR spectra of aromatic region of SA and probe **3** on addition of 1 eq. of SA, 2 eq. of SA in  $\text{DMSO-d}_6$ . 31
- Fig. SI 12: Partial  $^1\text{H}$  NMR spectra of aliphatic aromatic region of SA and probe **3** on addition of 1 eq. of SA, 2 eq. of SA in  $\text{DMSO-d}_6$ .
- 21.** Fig. SI 13: The lifetimes of samples (Compo 1 = probe **3** (black), Compo 2 = 1:1 complex with 3,5-dinitrobenzoic acid (red) and Compo 3 = 1:10 complex with 3,5-dinitrobenzoic acid (blue)) are almost similar. 32
- Fig. SI 14: The lifetimes of samples (Compo 1 = probe **3** (black), Compo 2 = 1:1 complex with 3,5-dinitrosalicylic acid (red) and Compo 3 = 1:10 complex with 3,5-dinitrosalicylic acid (blue)) are slightly different.
- 22.** Fig. SI 15: Partial  $^1\text{H}$  NMR spectra of aromatic region of 3,5-DNSA and probe **4** on addition of 1 eq. of 3,5-DNSA, 2 eq. of 3,5-DNSA in  $\text{DMSO-d}_6$ . 33
- Fig. SI 16: Partial  $^1\text{H}$  NMR spectra of aliphatic region of 3,5-DNSA and probe **4** on addition of 1 eq. of 3,5-DNSA, 2 eq. of 3,5-DNSA in  $\text{DMSO-d}_6$ .
- 23.** Fig. SI 17: Partial  $^1\text{H}$  NMR spectra of aromatic region of 3,5-DNSA and probe **5** on addition of 1 eq. of 3,5-DNSA in  $\text{DMSO-d}_6$ . 34
- Fig. SI 18: Partial  $^1\text{H}$  NMR spectra of aliphatic region of 3,5-DNSA and probe **5** on addition of 1 eq. of 3,5-DNSA in  $\text{DMSO-d}_6$ .
- 24.** SI Table 1: The contributions of each electronic oscillator (orbital transitions) to the lowest energy transition. 35
- Fig. SI 19: B3LYP/6-31G\* calculated molecular orbitals of 5-NSA, 3,5-DNSA and probe **3**.
- 25.** Fig. SI 20: B3LYP/6-31G\* calculated molecular orbitals of probe **3** + 5-NSA 36

and probe **3** + 3,5-DNSA.

26. Fig. SI 21: Fluorescence emission spectra of probe **3** and its complexes with 3,5-DNSA and 5-NSA, obtained by using B3LYP/6-31G\*.

Fig. SI 22: Fluorescence intensity at  $\lambda_{max}$  of probe **3** and [**3**•3,5-DNSA] (1  $\mu$ M, EtOH-H<sub>2</sub>O 10%) vs pH,  $\lambda_{ex}$  = 336 nm, slit width 3,3.

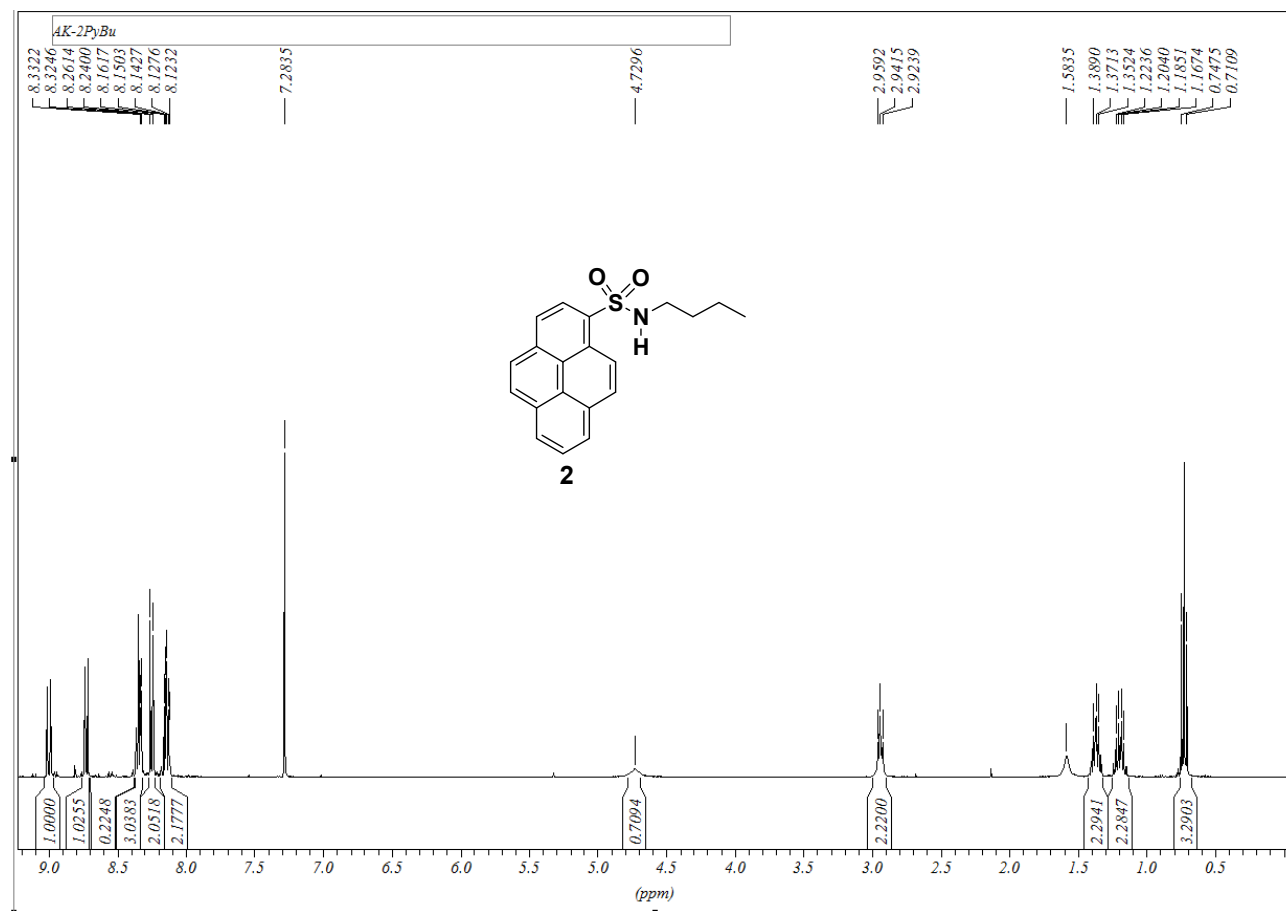

<sup>1</sup>H NMR of probe **2** CDCl<sub>3</sub>.

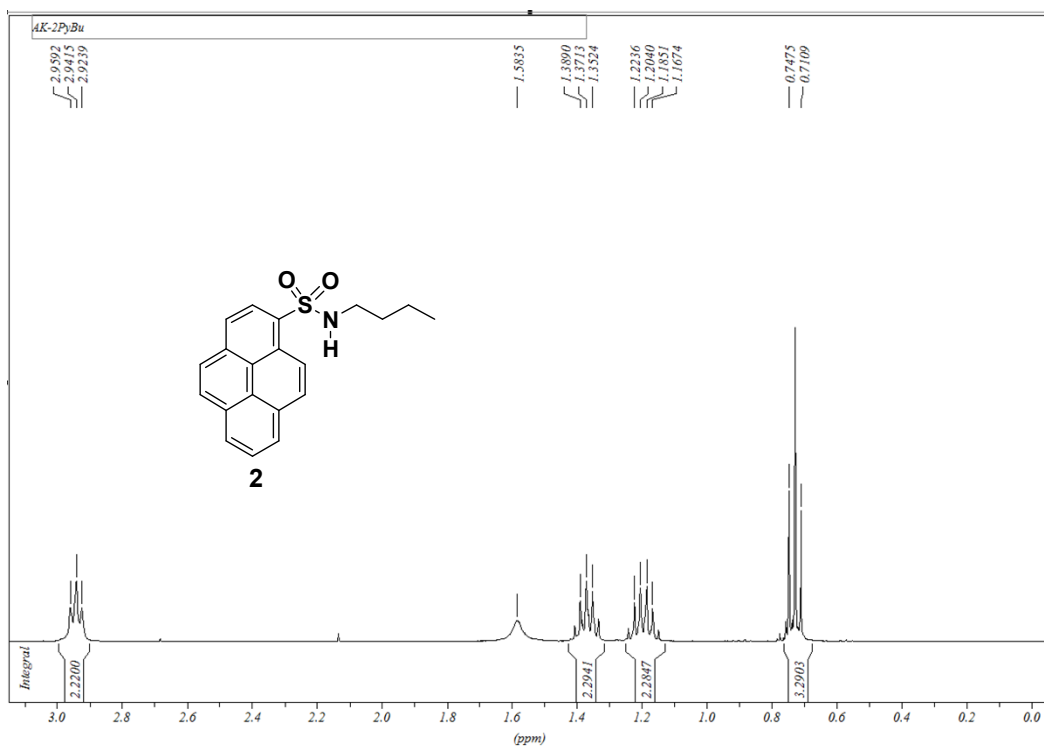

<sup>1</sup>H NMR of probe **2** aliphatic region in CDCl<sub>3</sub>

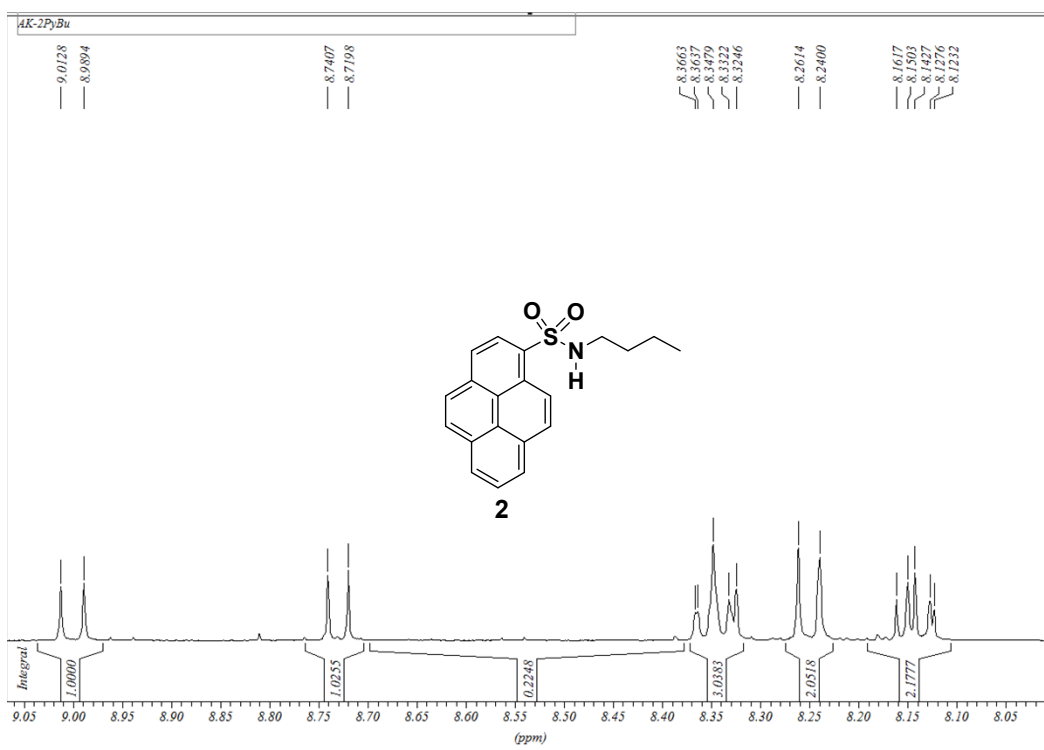

<sup>1</sup>H NMR of probe **2** aromatic region in CDCl<sub>3</sub>

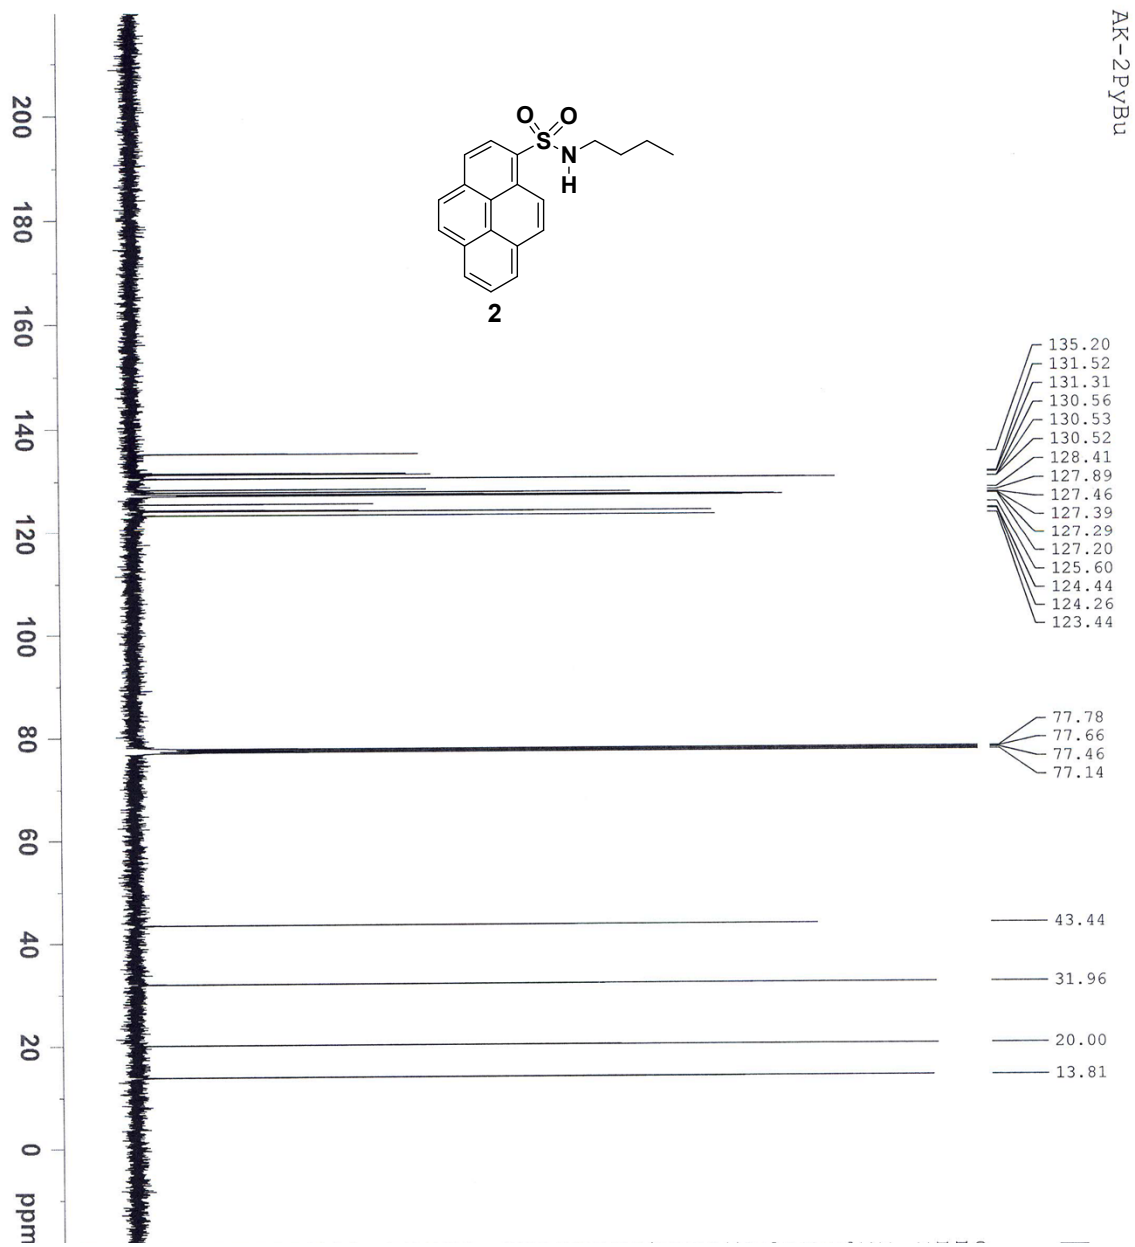

$^{13}\text{C}$  NMR of probe **2** in  $\text{CDCl}_3$

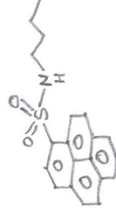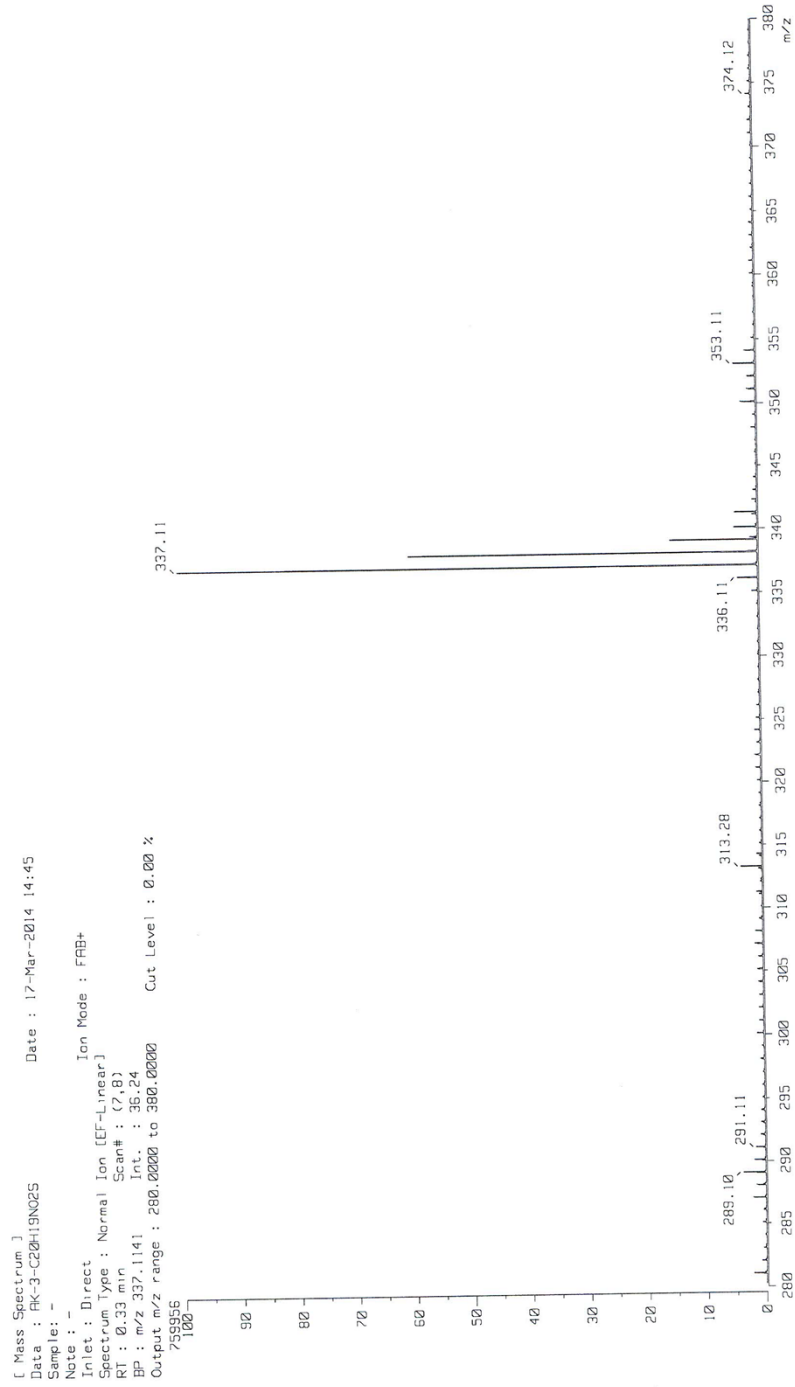

HRMS of probe 2

[ Mass Spectrum ]  
Date : 17-Mar-2014 14:45  
Sample : -  
Note : -  
Inlet : Direct Ion Mode : FFB+  
Spectrum Type : Normal Ion [EF-Linear]  
RT : 0.33 min Scan# : (7,8)  
BP : m/z 337.114 Int. : 36.24  
Output m/z range : 328.6647 to 348.6944 Cut Level : 0.00 %  
807915

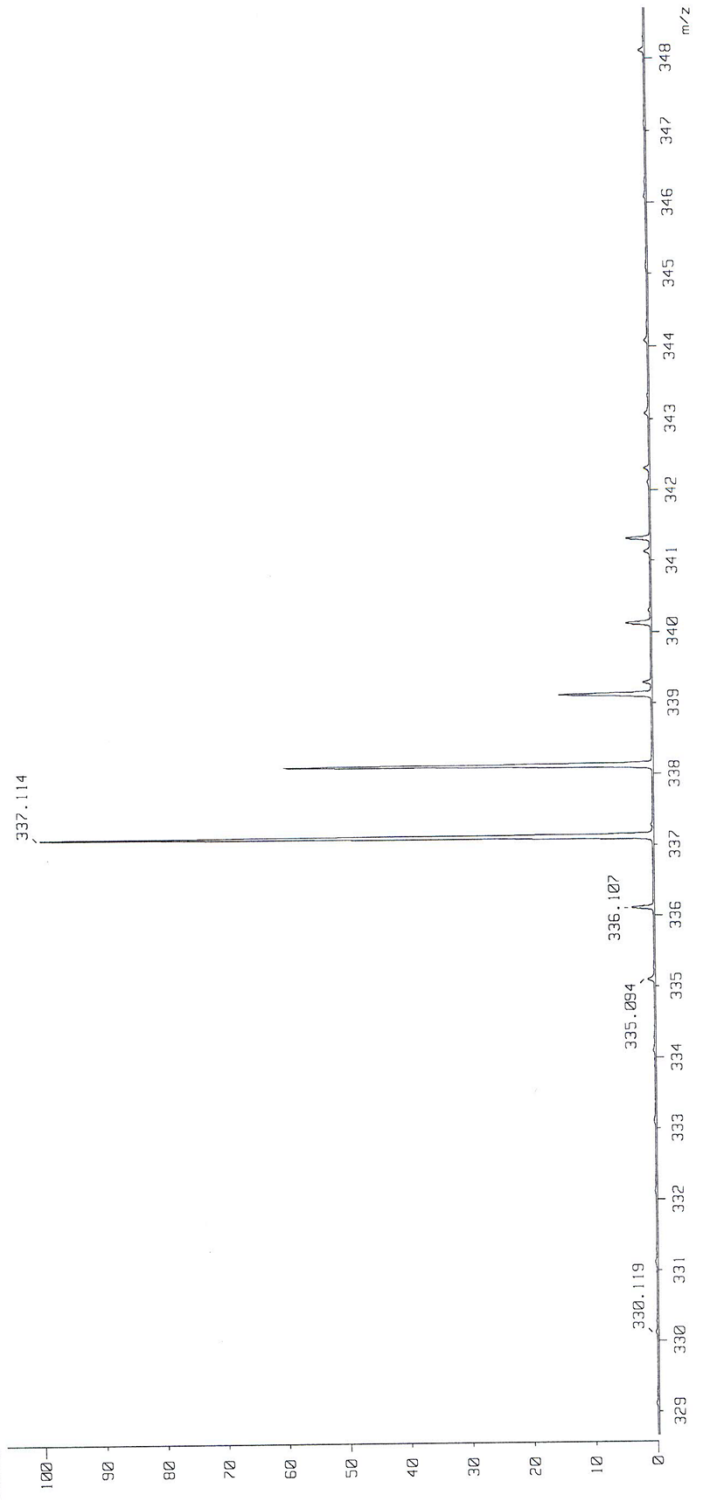

HRMS of probe 2



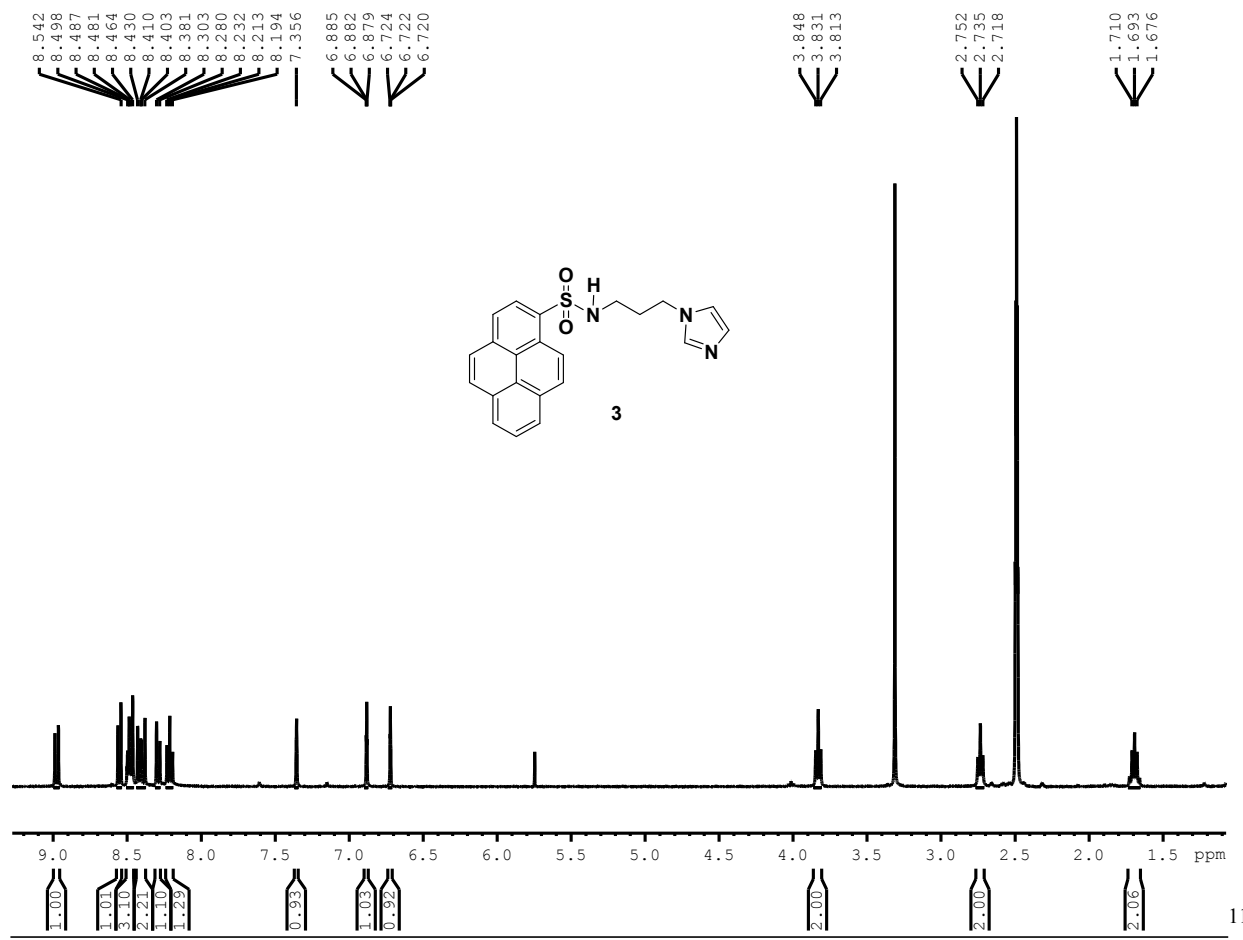

11

<sup>1</sup>H NMR of probe 3 in DMSO-d<sub>6</sub>.

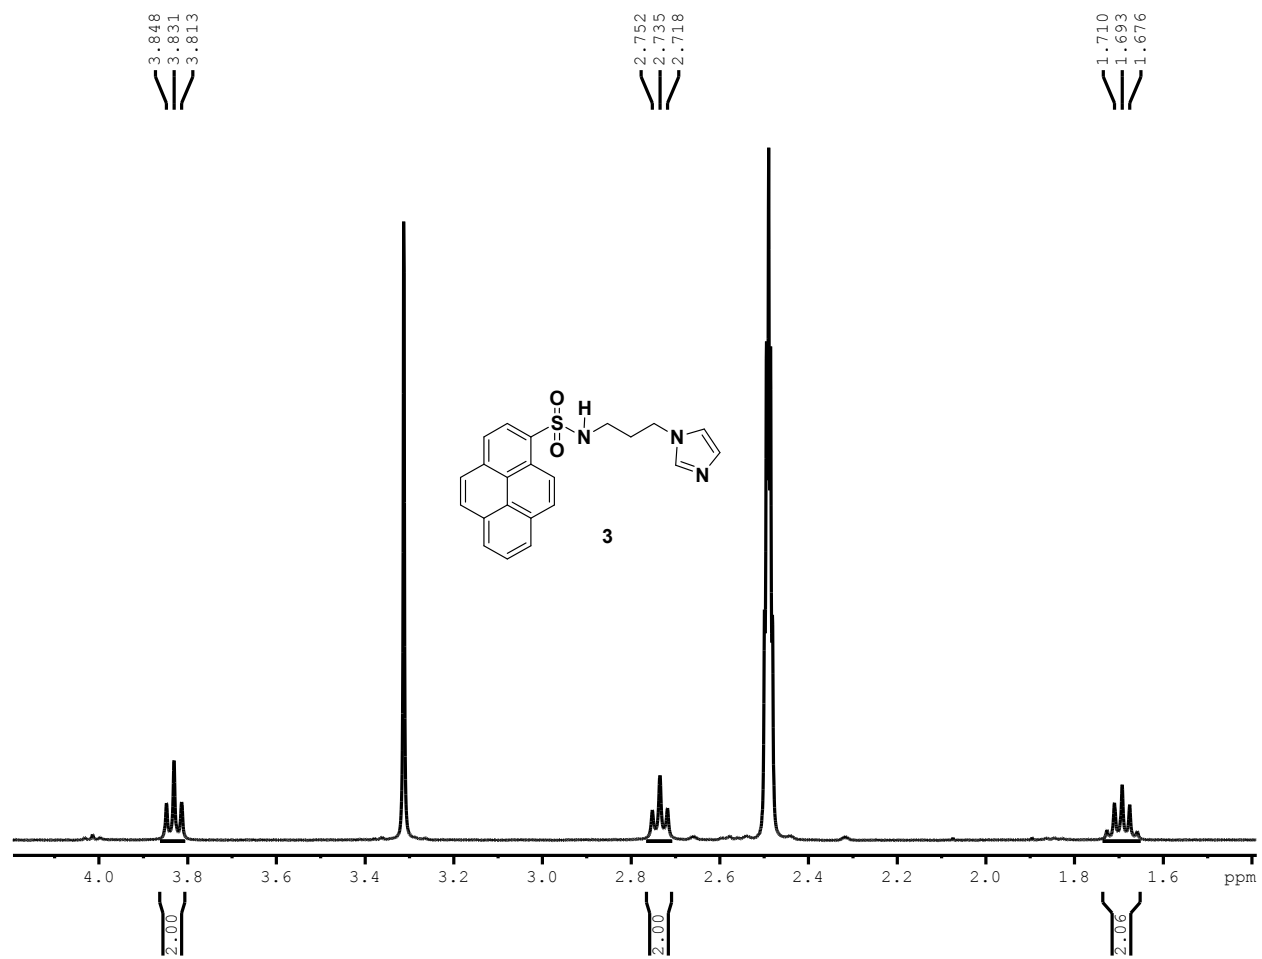

$^1\text{H}$  NMR of probe **3** aliphatic region in  $\text{DMSO-d}_6$ .

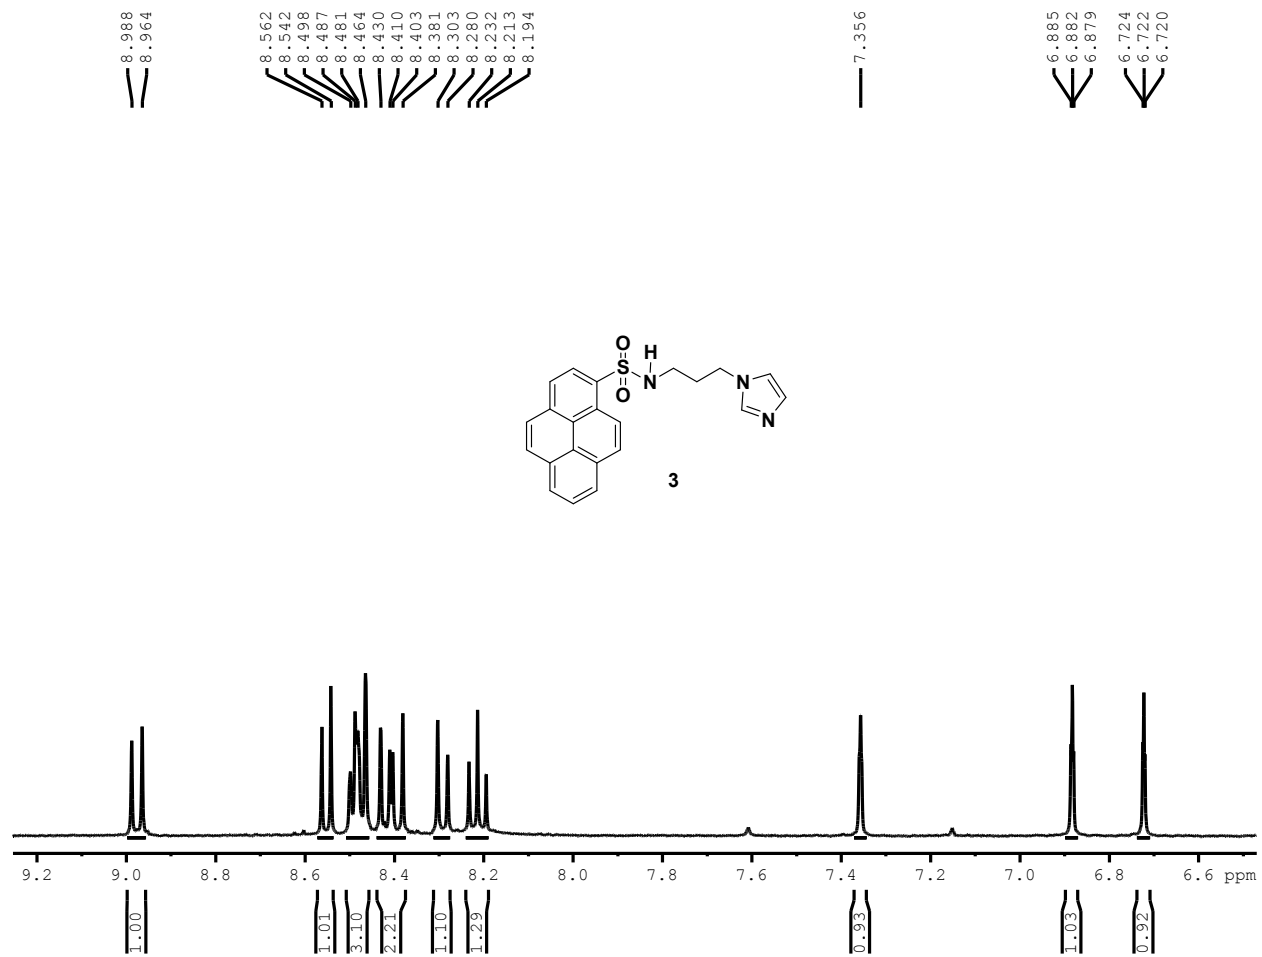

<sup>1</sup>H NMR of probe **3** aromatic region in DMSO-d<sub>6</sub>

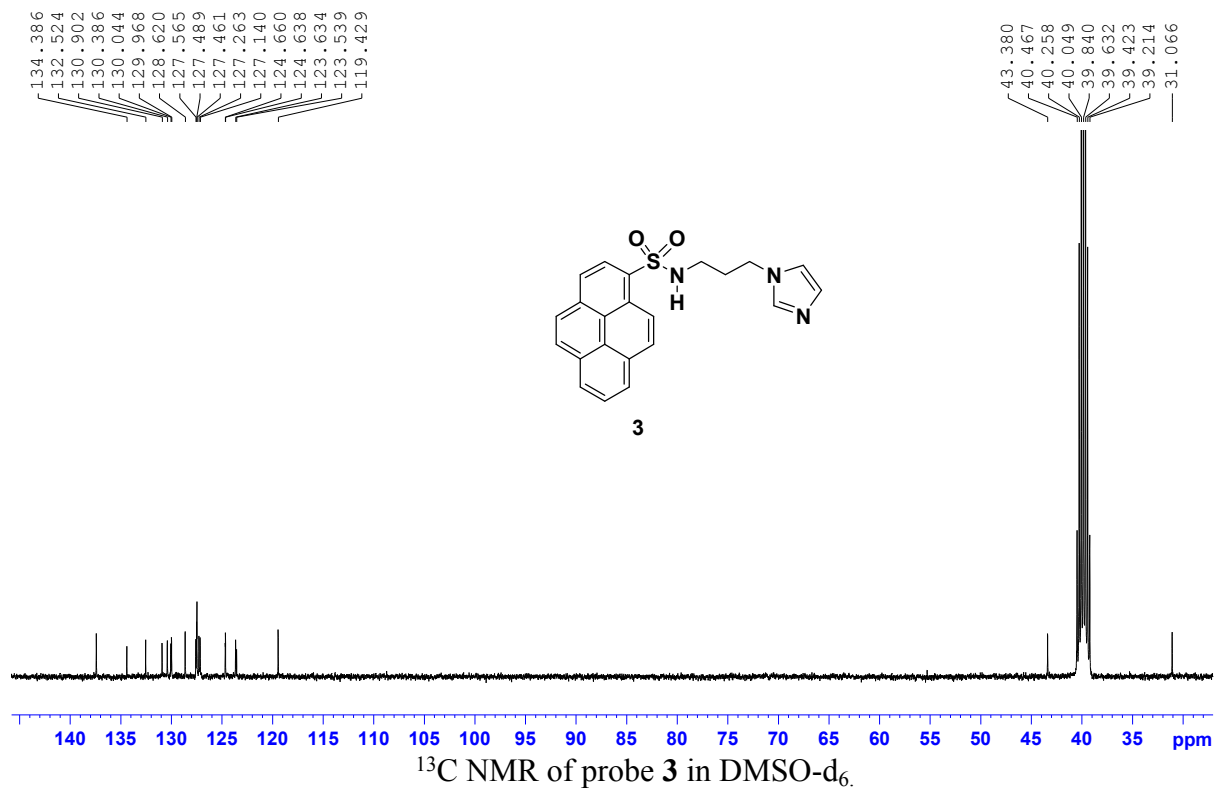

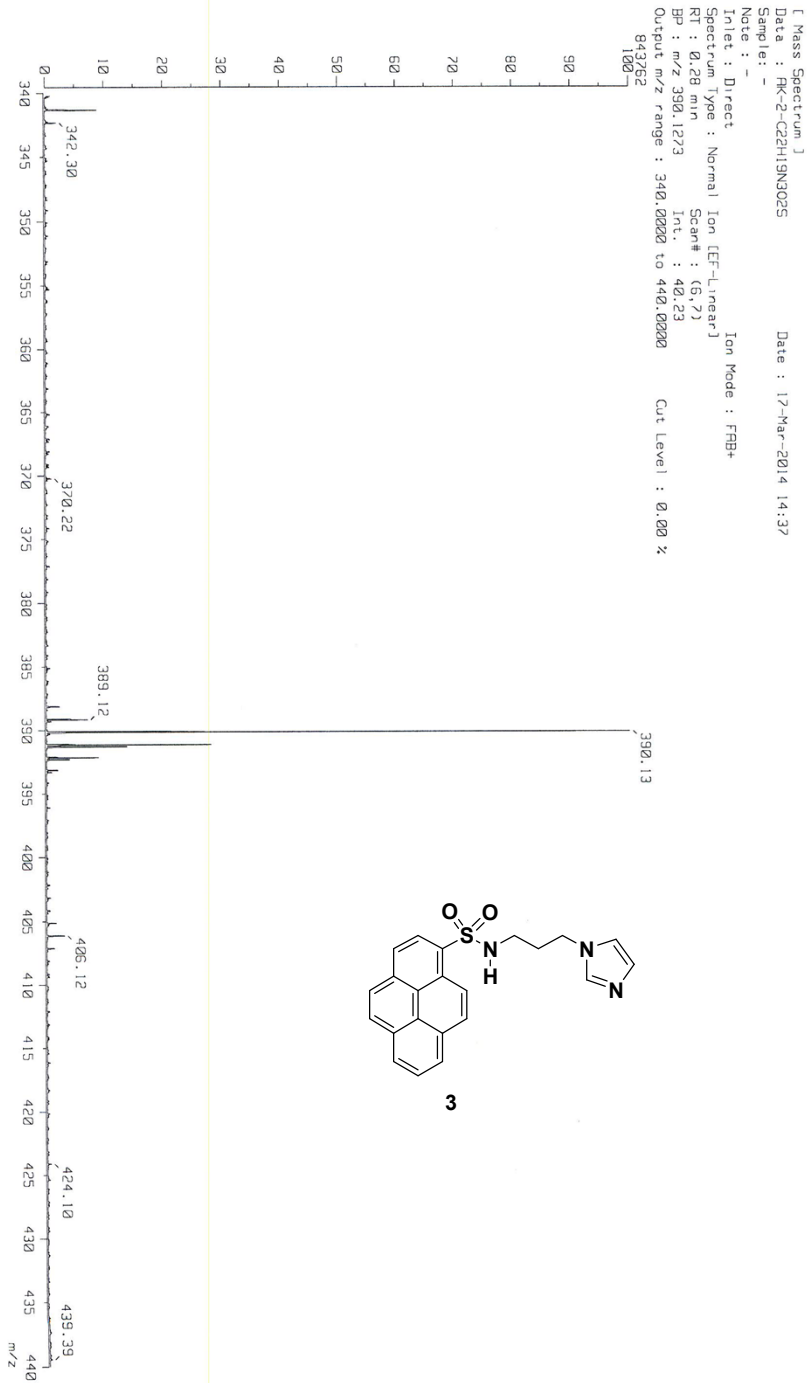

HRMS of probe 3

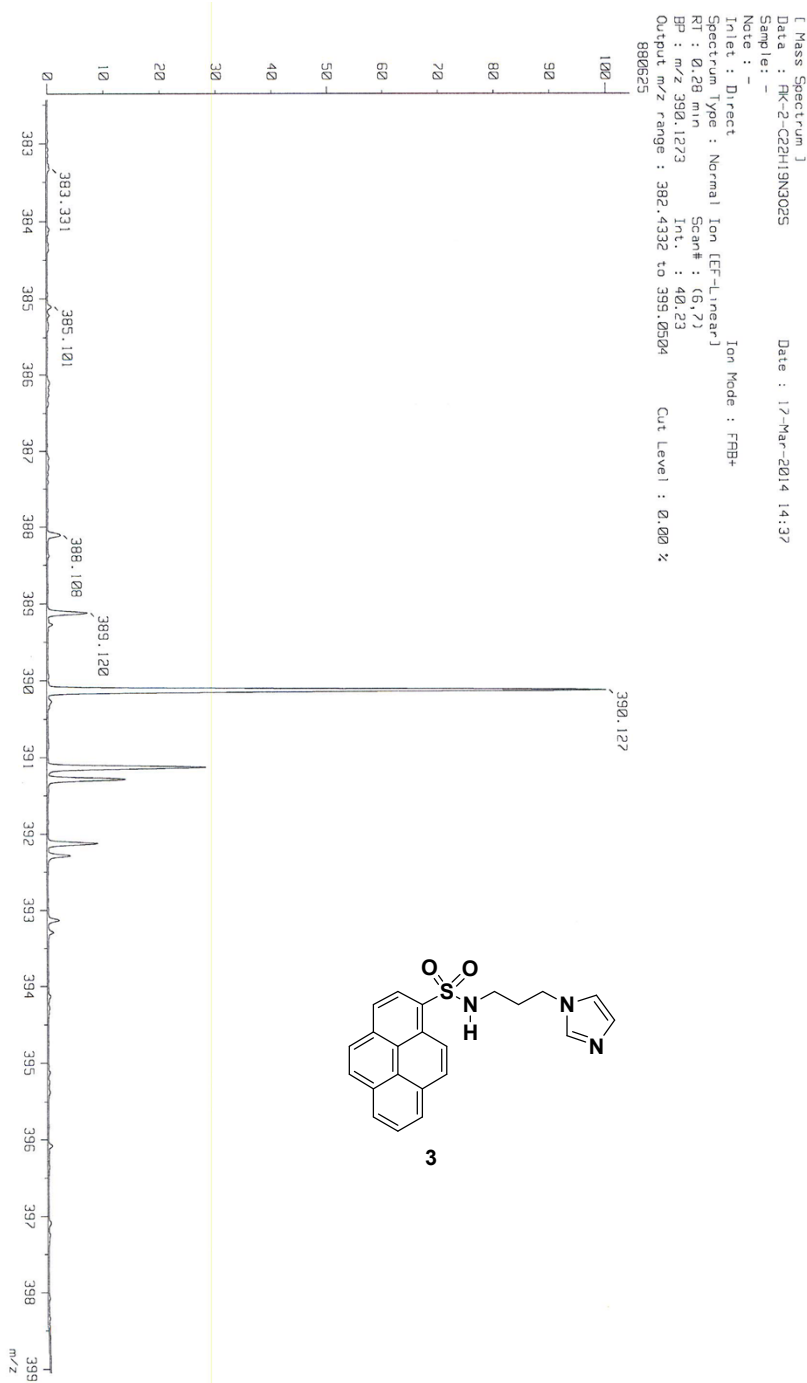

HRMS of probe 3

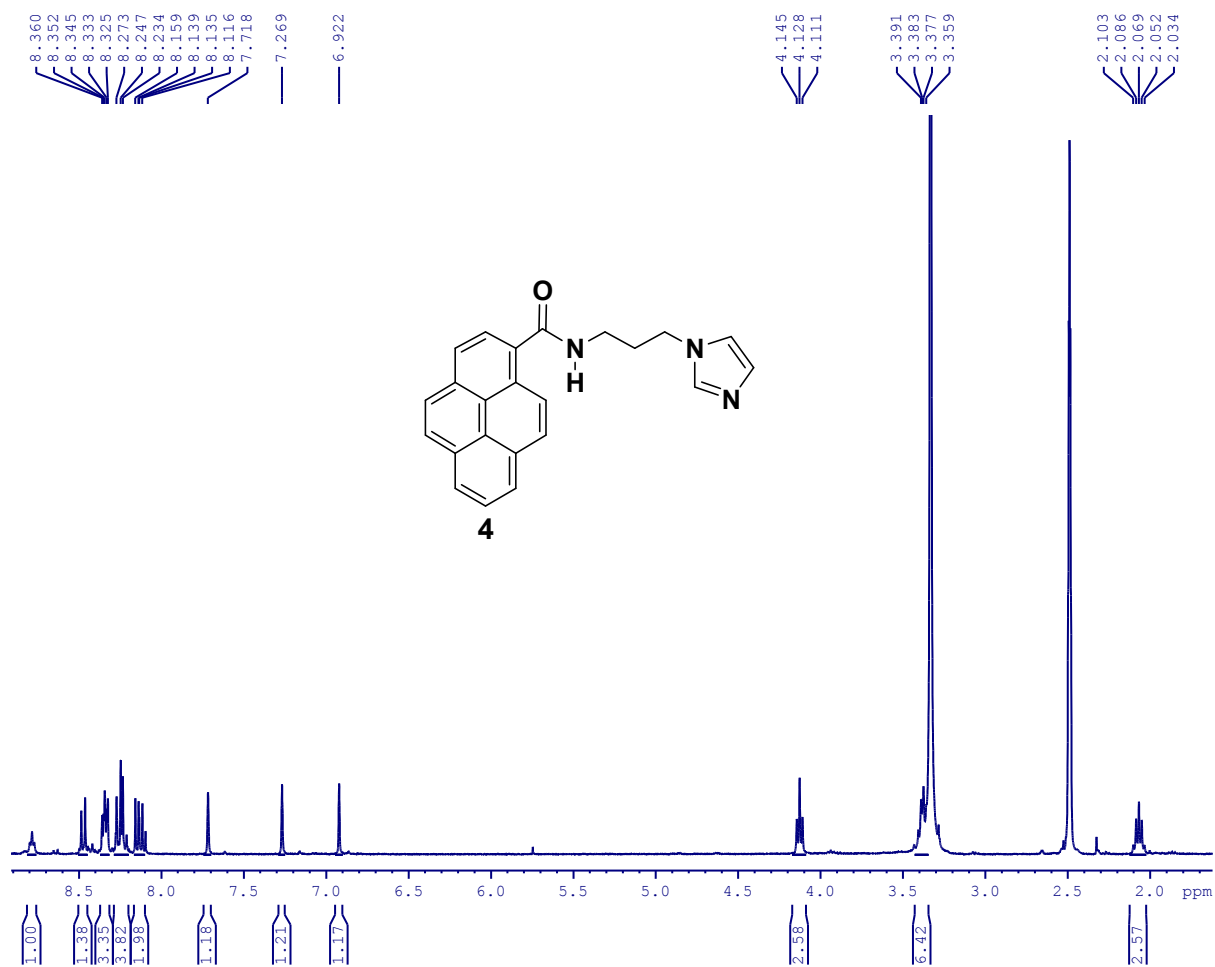

<sup>1</sup>H NMR of probe 4 in DMSO-d<sub>6</sub>.

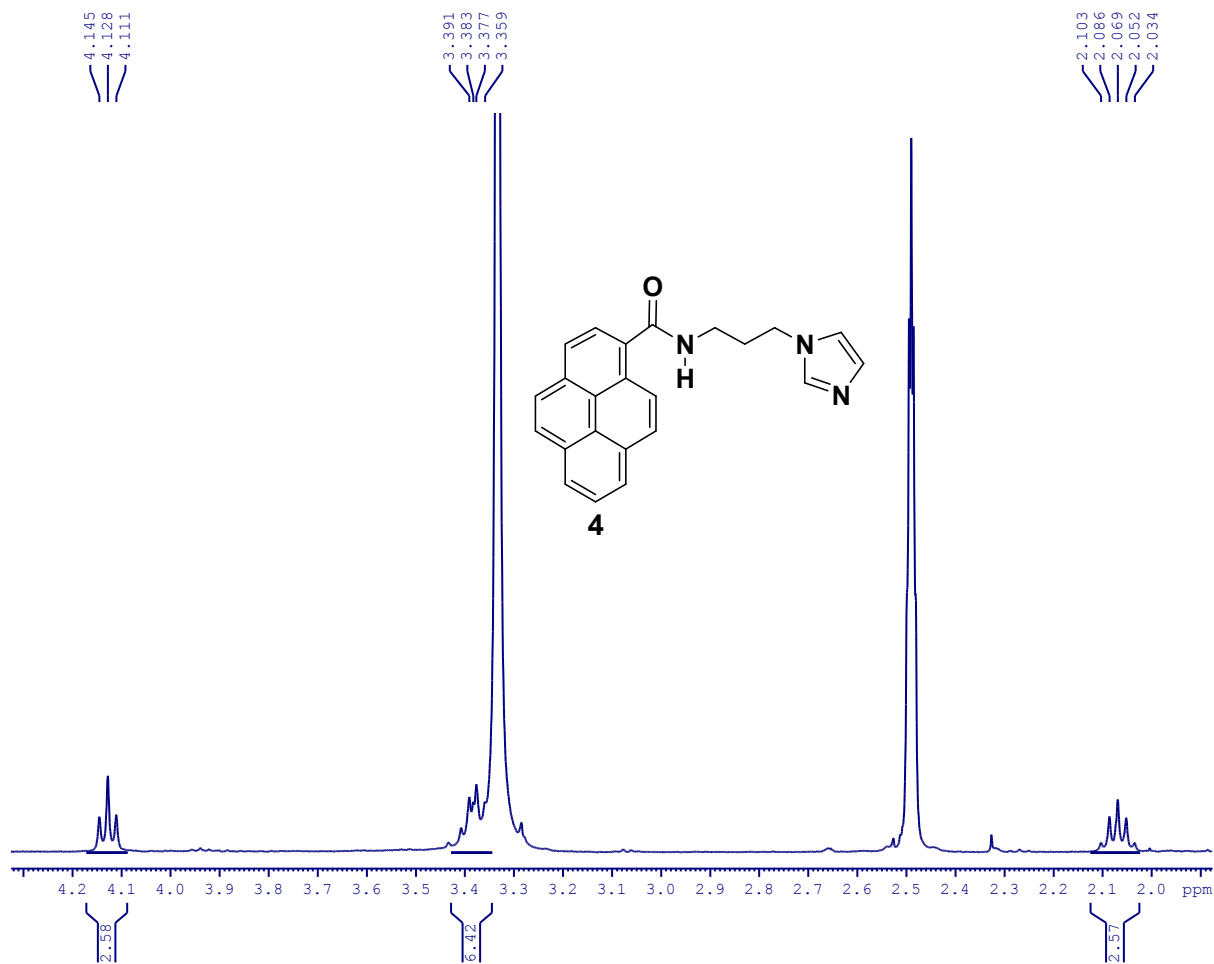

<sup>1</sup>H NMR of probe 4 aliphatic region in DMSO-d<sub>6</sub>.



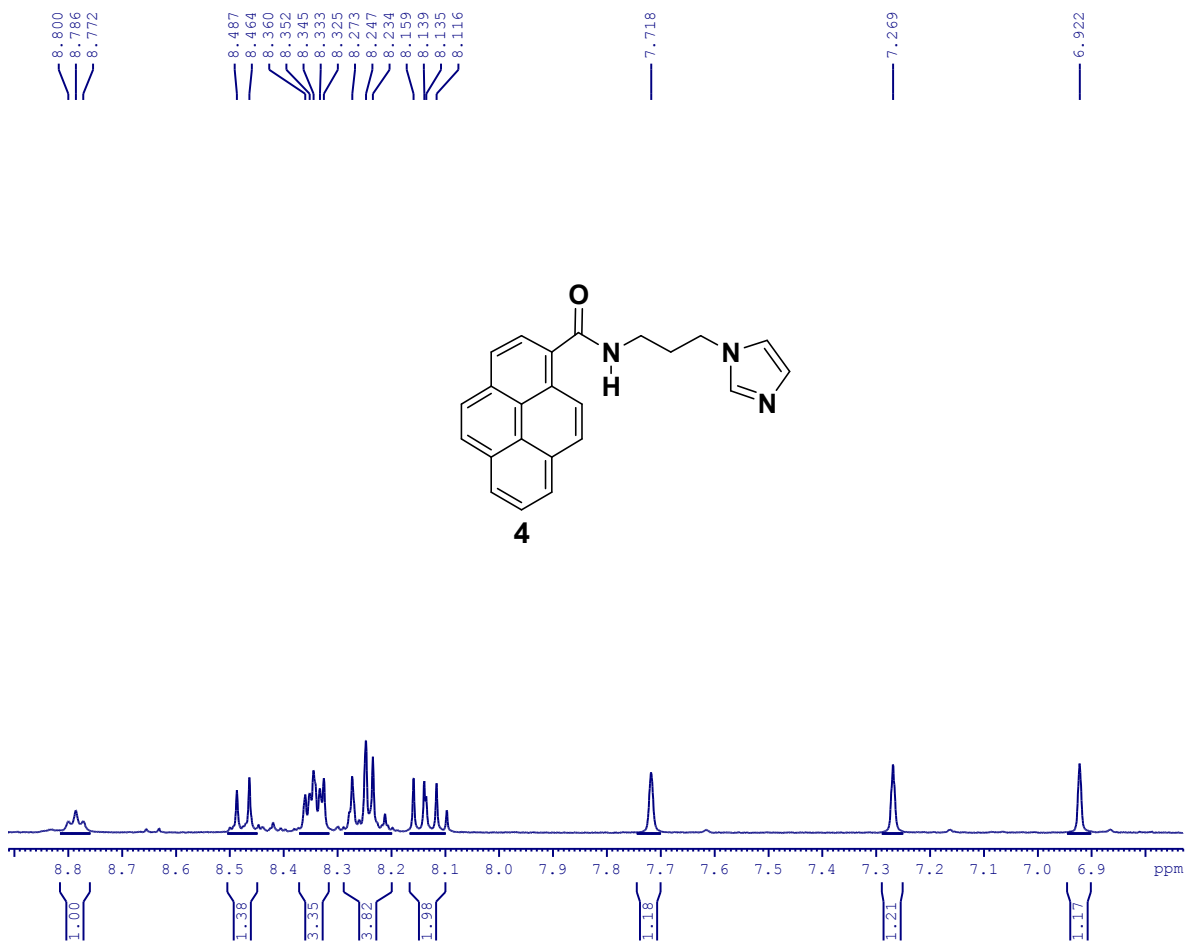

<sup>1</sup>H NMR of probe 4 aromatic region in DMSO-d<sub>6</sub>

AK-8

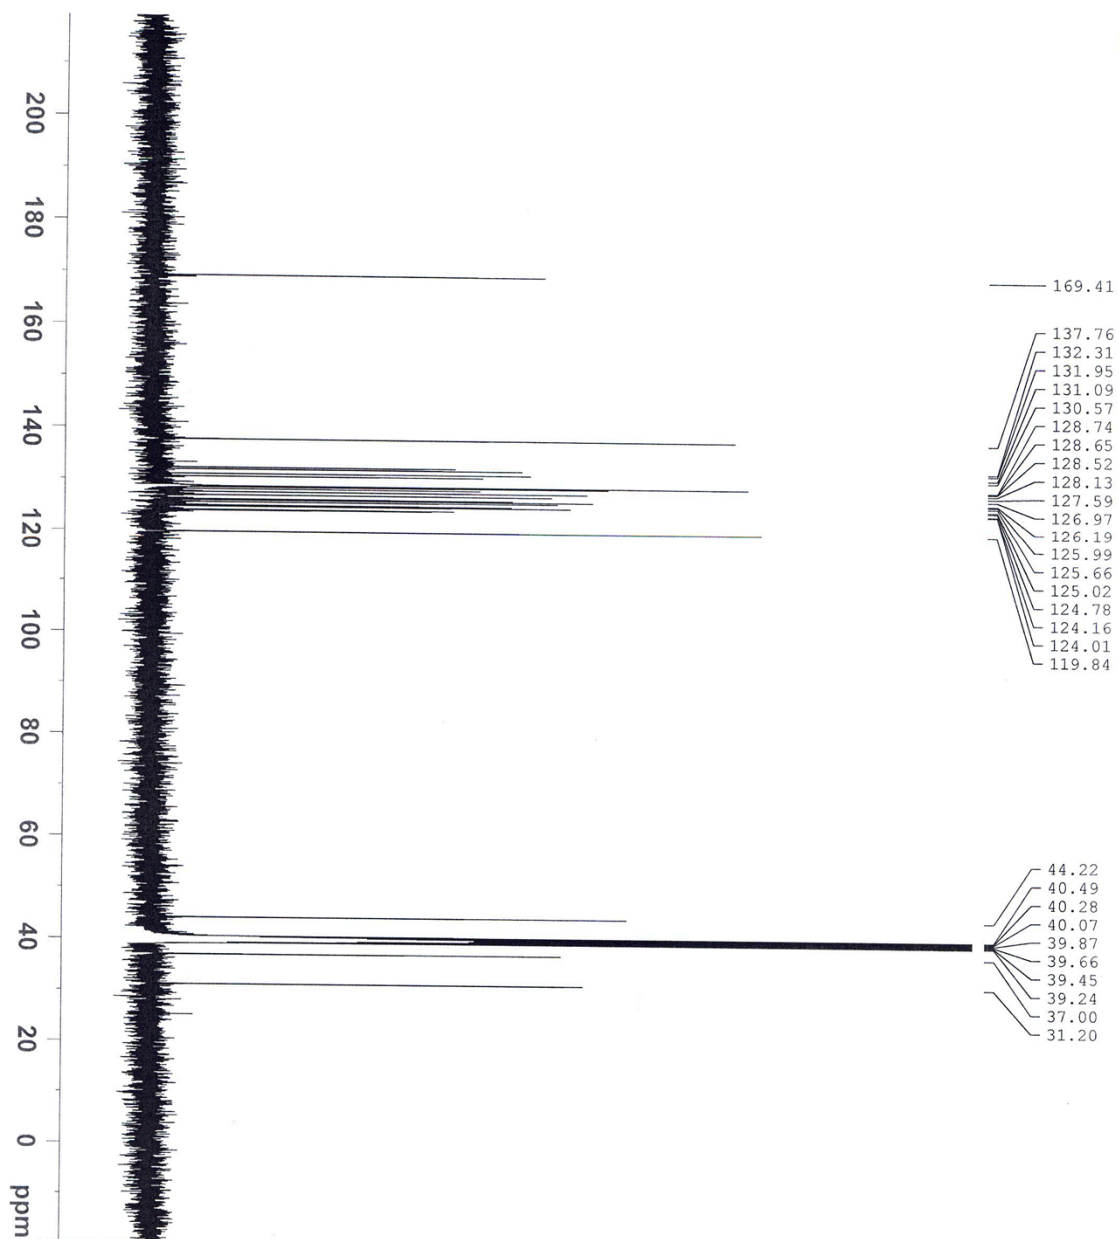

<sup>13</sup>C NMR of probe 4 in DMSO-d<sub>6</sub>.

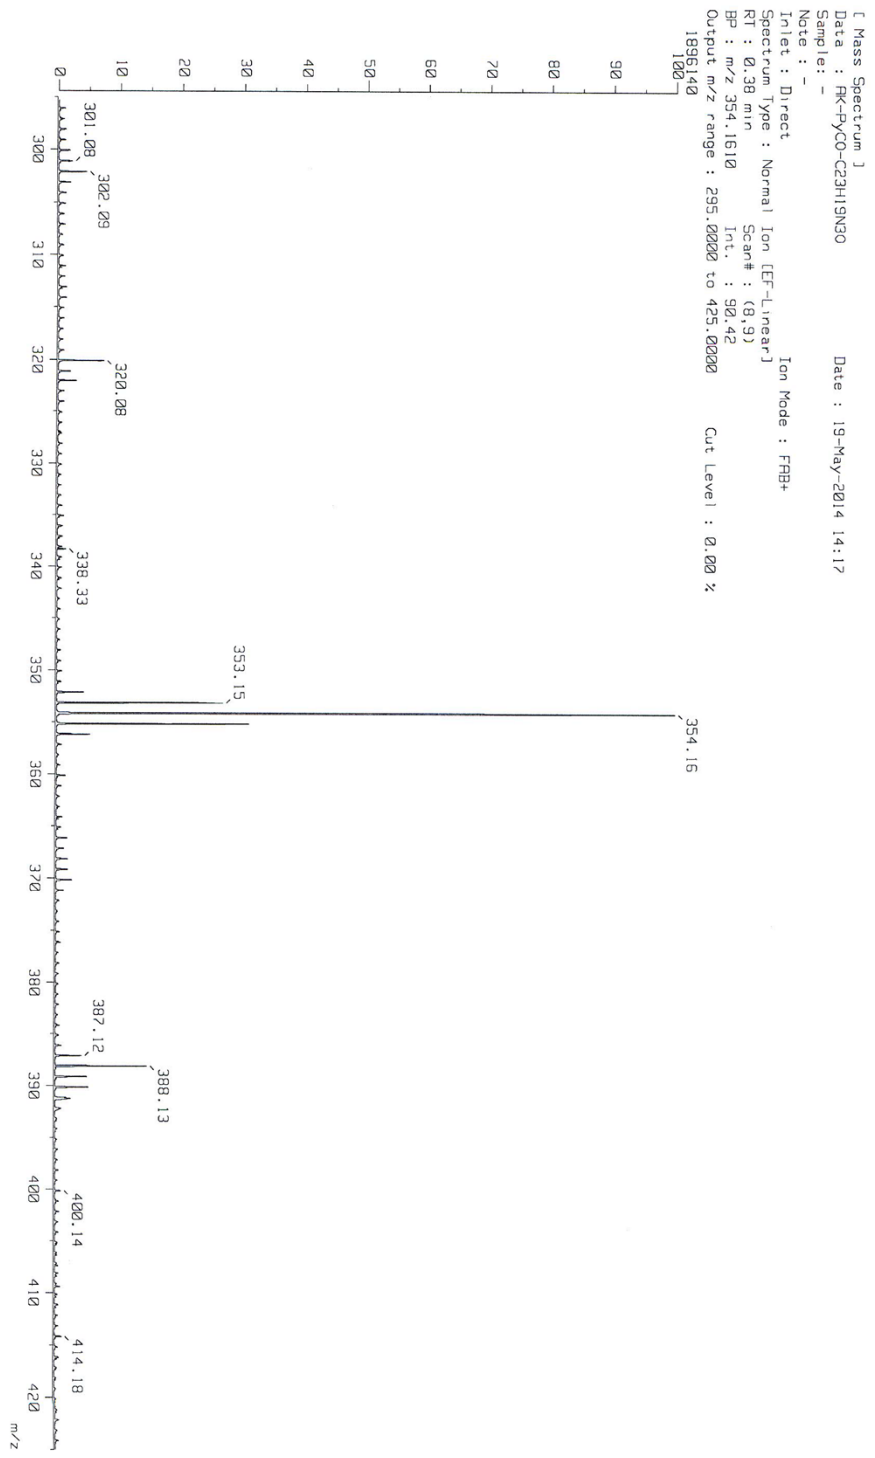

HRMS of probe 4

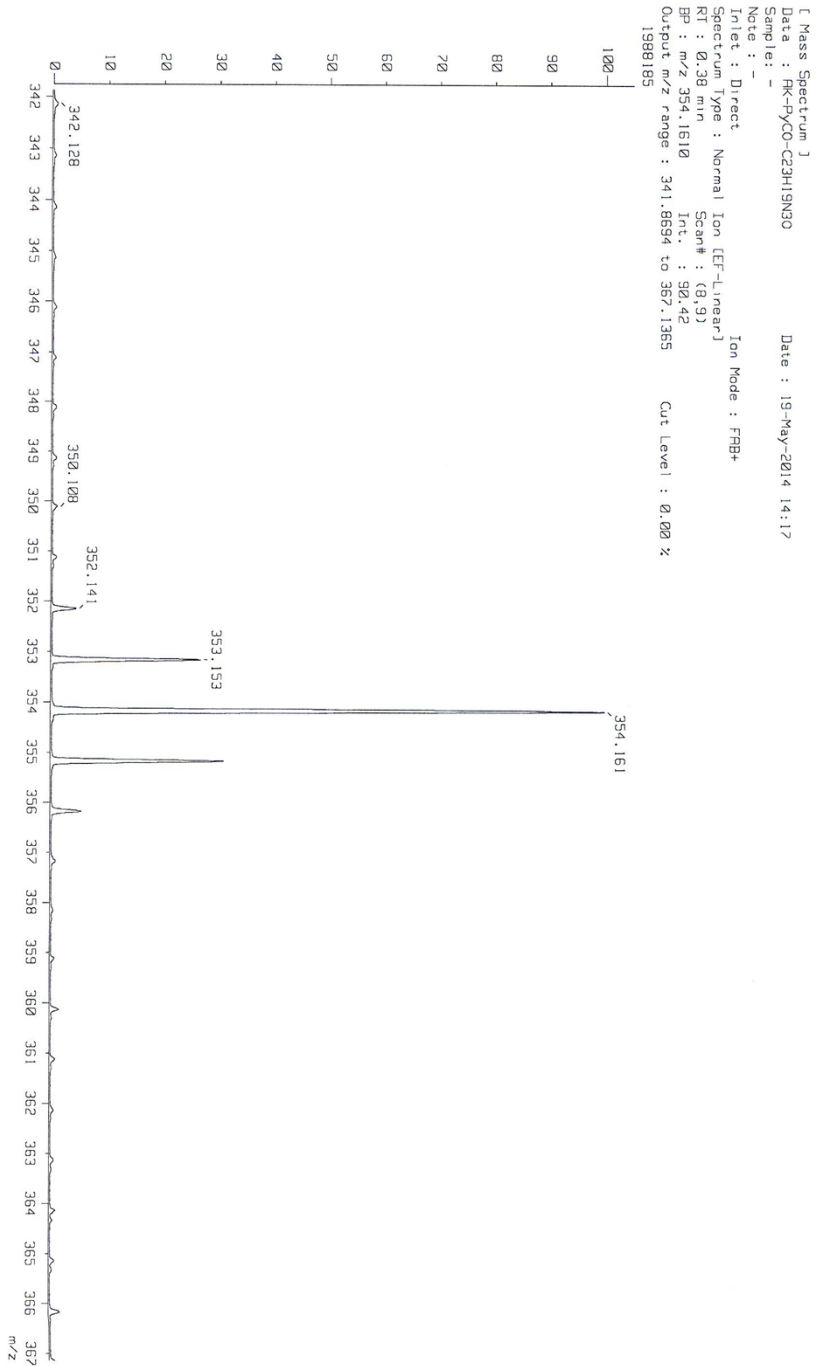

HRMS of probe 4

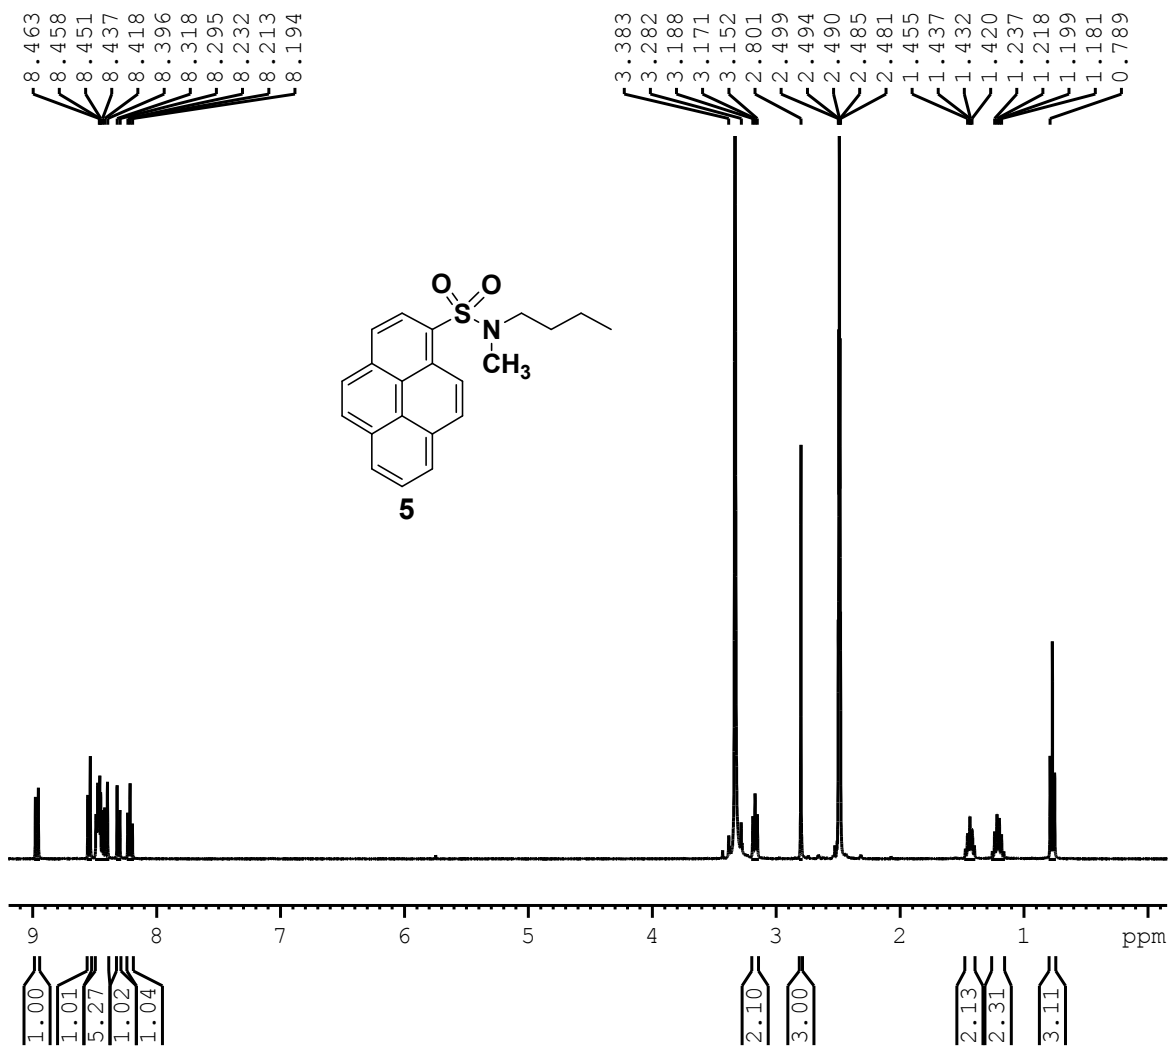

<sup>1</sup>H NMR of probe **5** in CDCl<sub>3</sub>.

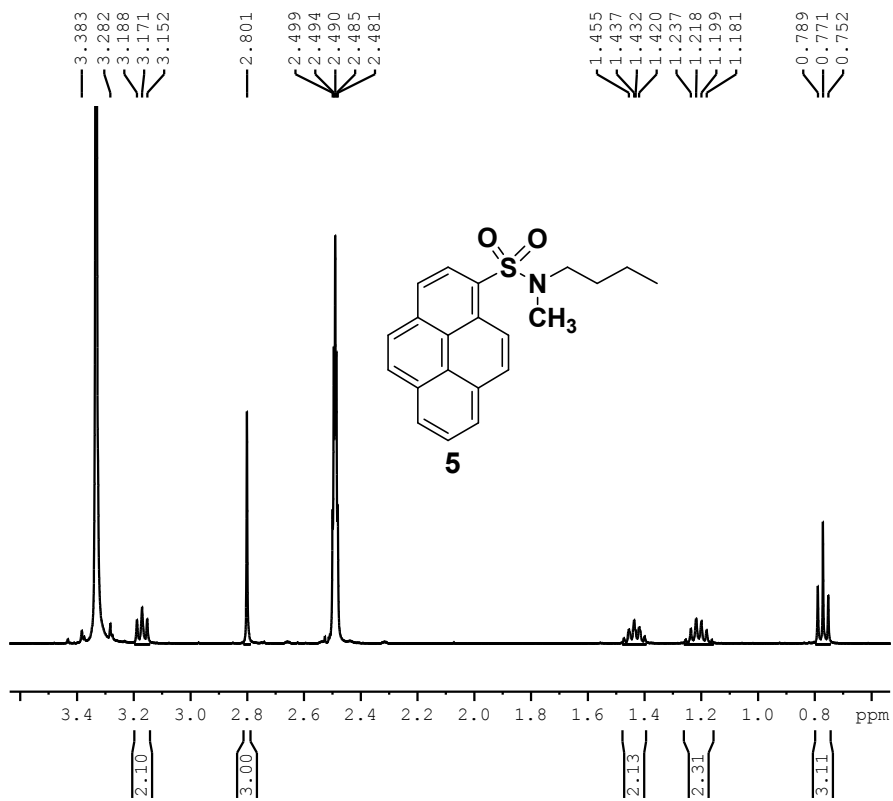

<sup>1</sup>H NMR of probe **5** aliphatic region in CDCl<sub>3</sub>.

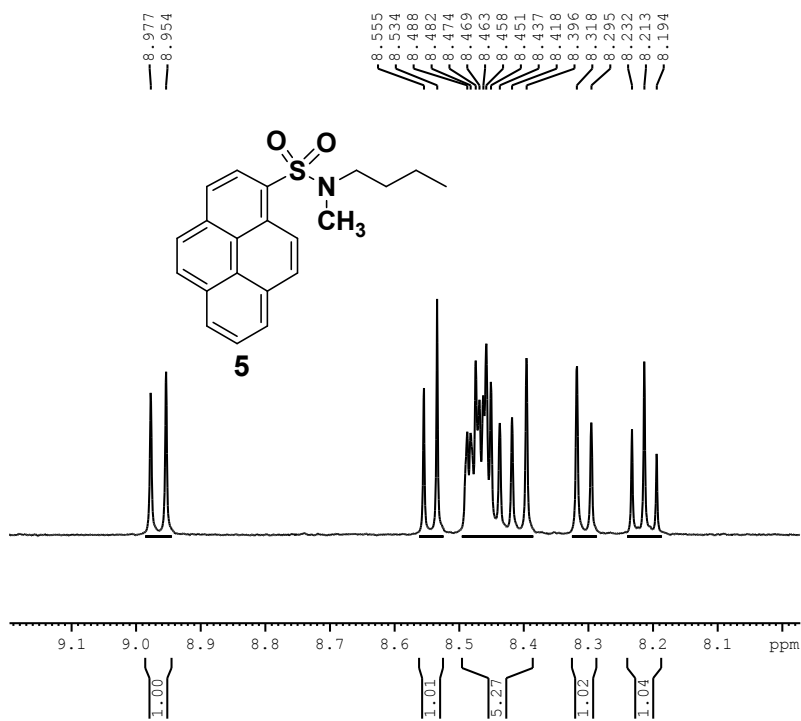

<sup>1</sup>H NMR of probe **5** aromatic region in CDCl<sub>3</sub>.

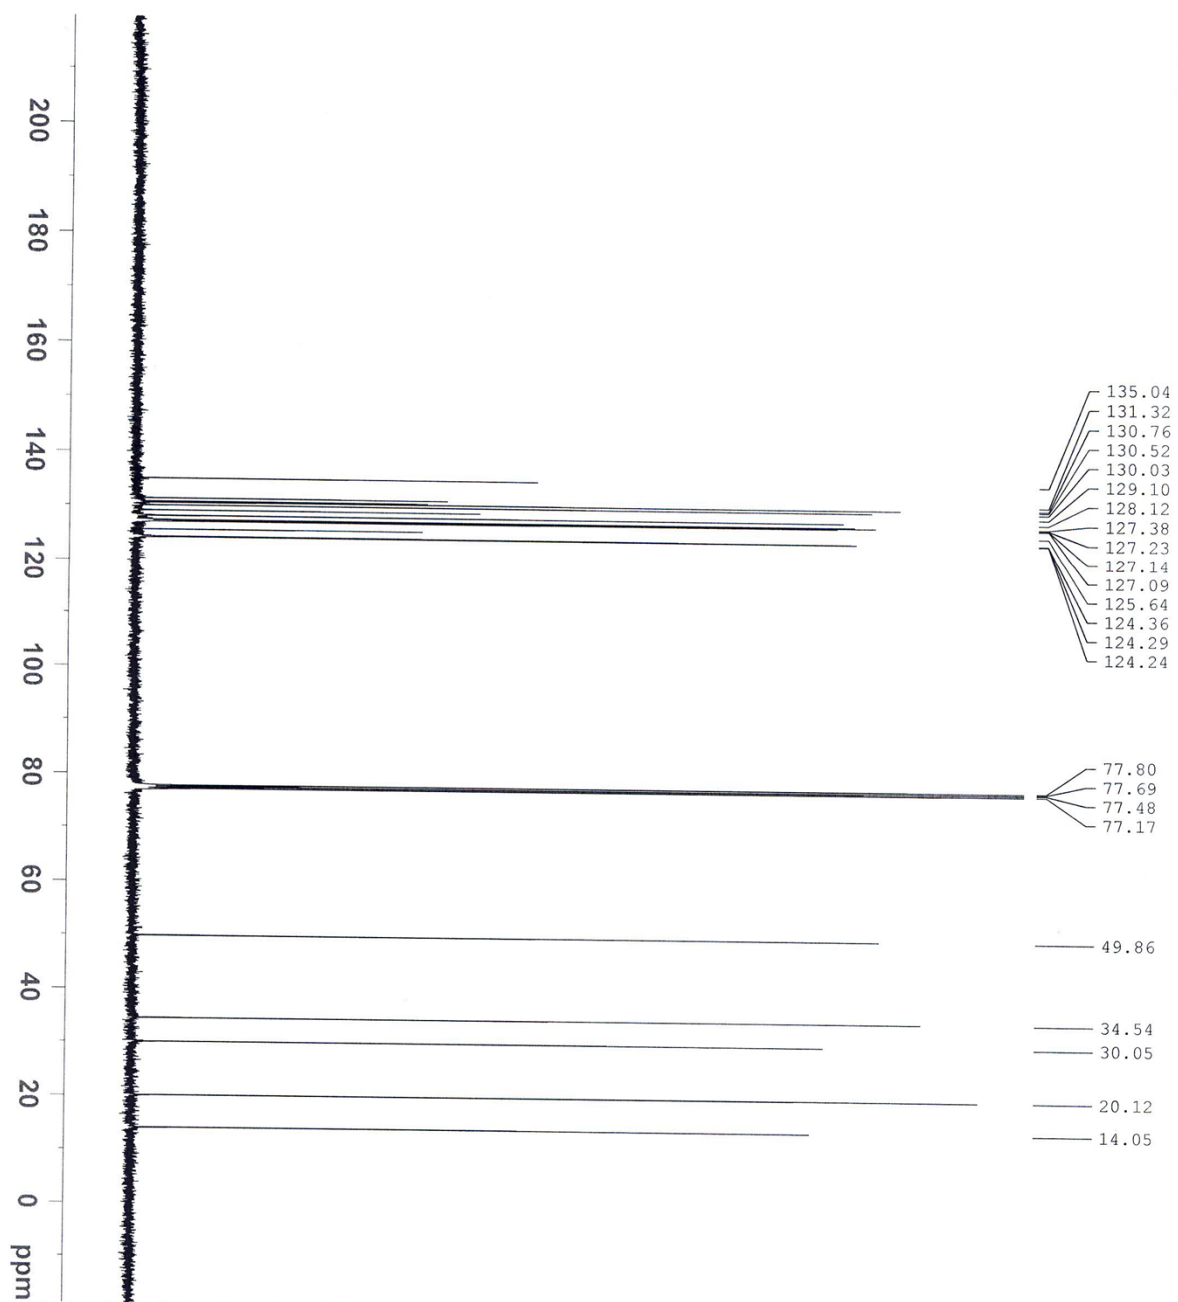

$^{13}\text{C}$  NMR of probe 5 in  $\text{CDCl}_3$ .

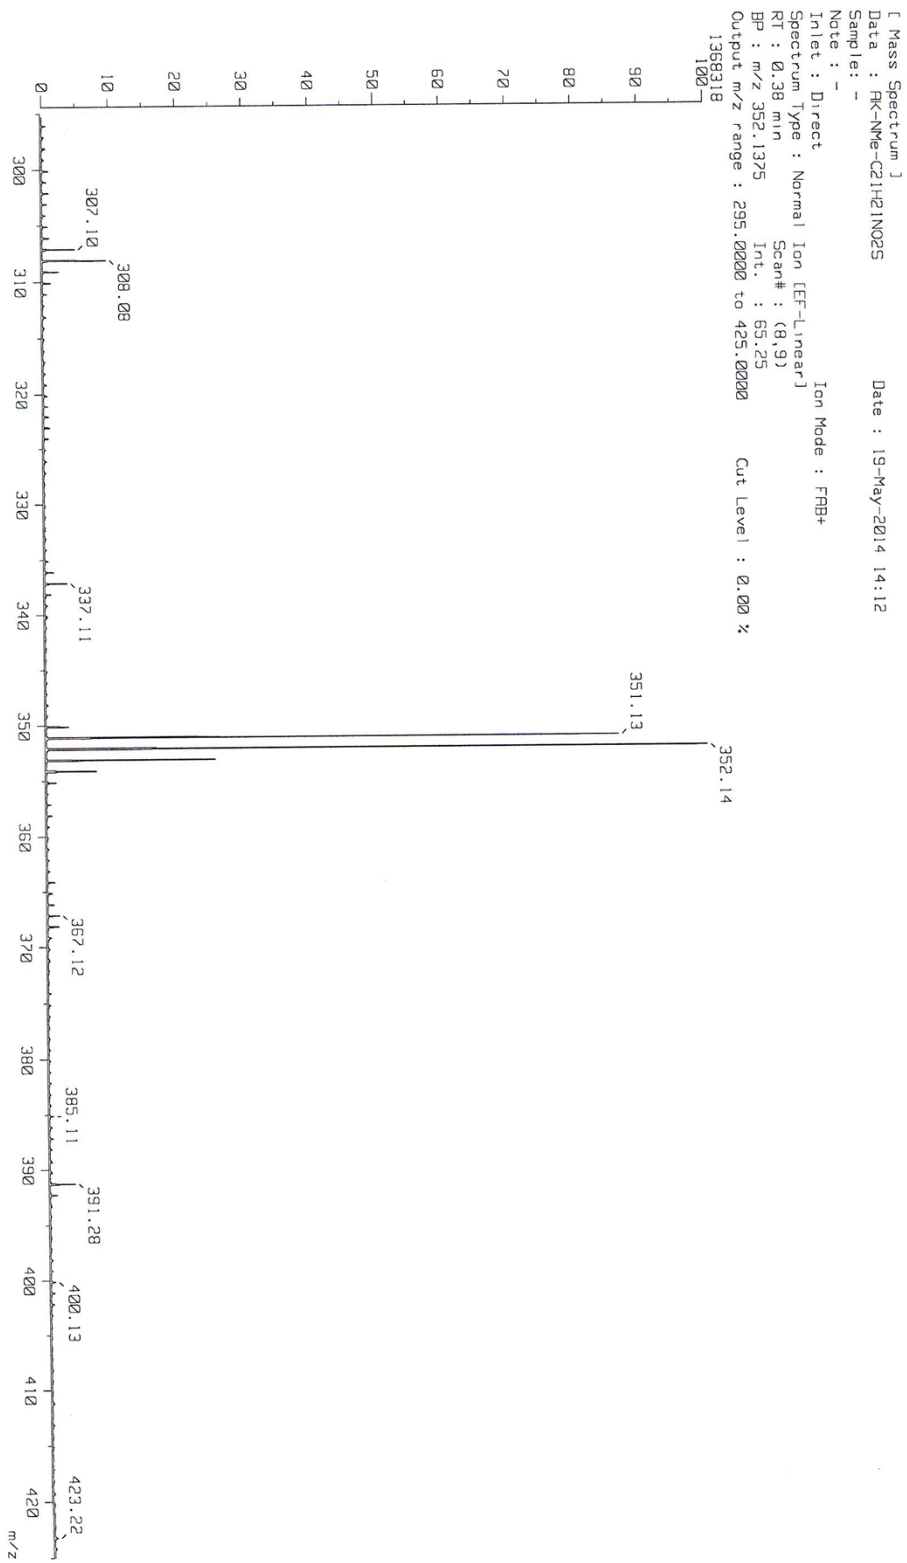

HRMS of probe 5



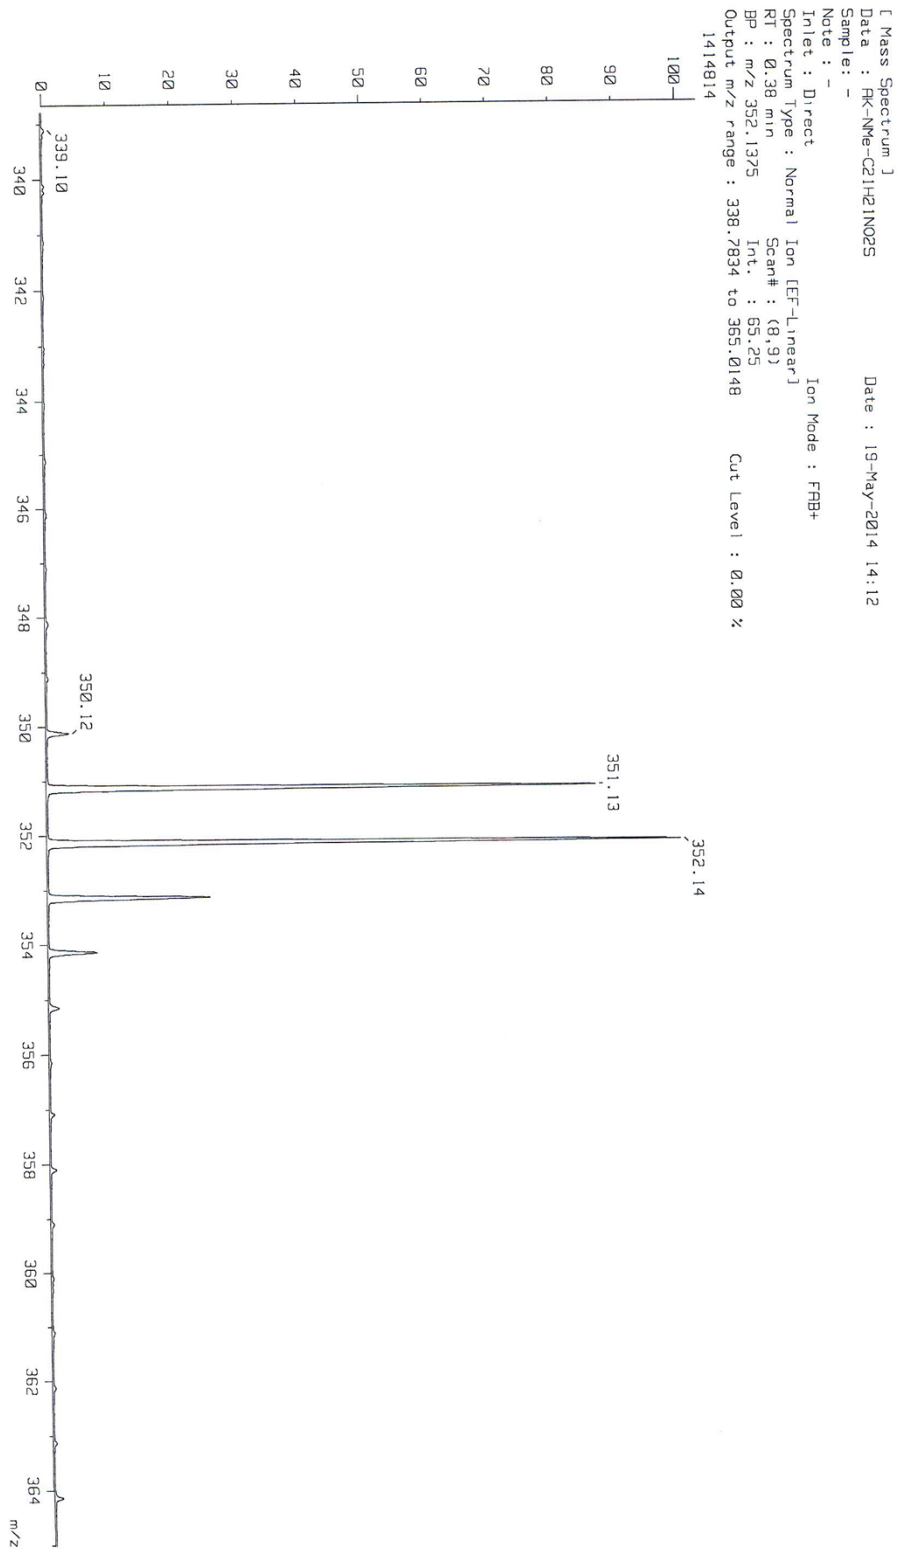

HRMS of probe 5

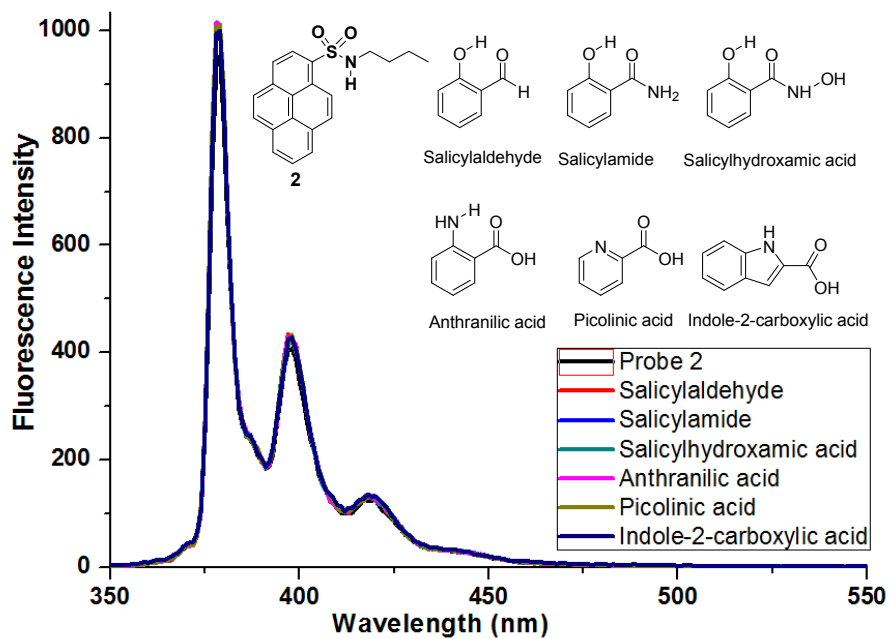

Fig. SI 1: Fluorescence study of probe 2 (1  $\mu\text{M}$ , EtOH) with different salicylic derivatives/similar moieties,  $\lambda_{ex} = 336$  nm, slit width 3,3.

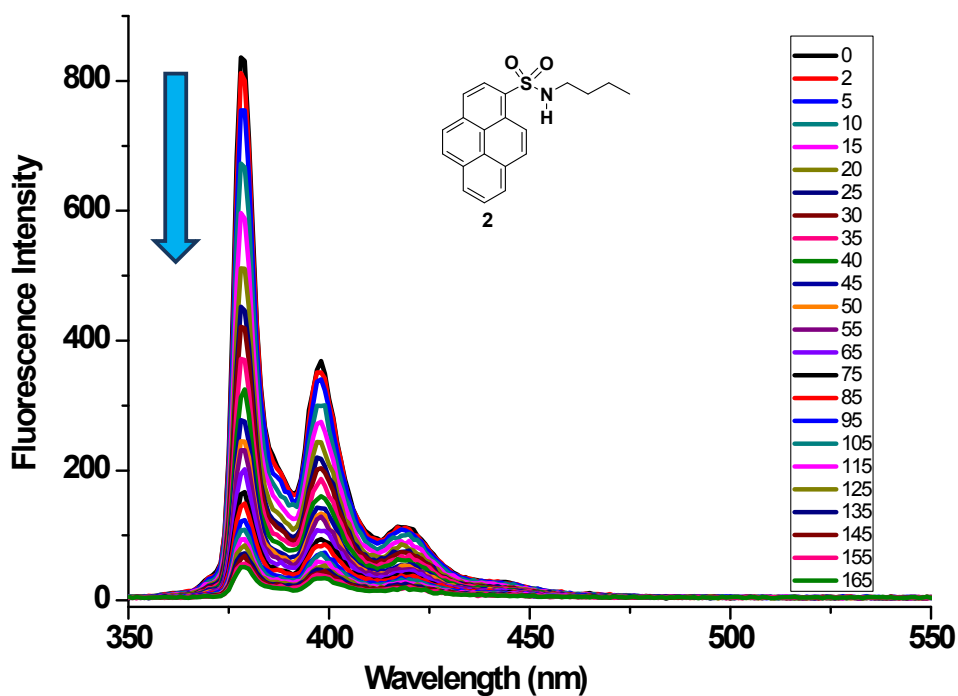

Fig. SI 2: Fluorescence titration of probe 2 (1  $\mu\text{M}$ , EtOH) with 3,5-Dinitrosalicylic acid,  $\lambda_{ex} = 336$  nm.

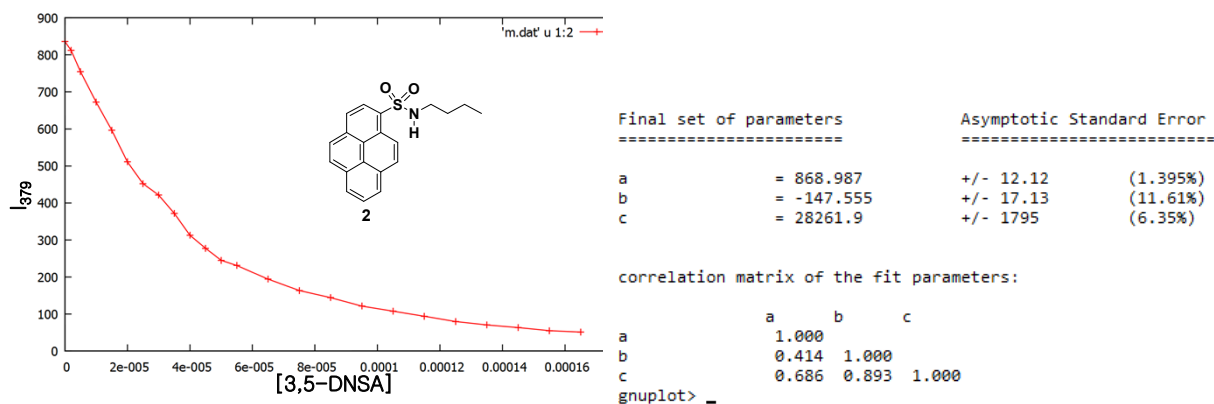

Fig. SI 3: Fluorescence spectral fitting of probe **2** (1  $\mu$ M, EtOH) with [3,5-Dinitrosalicylic Acid] and association constant.

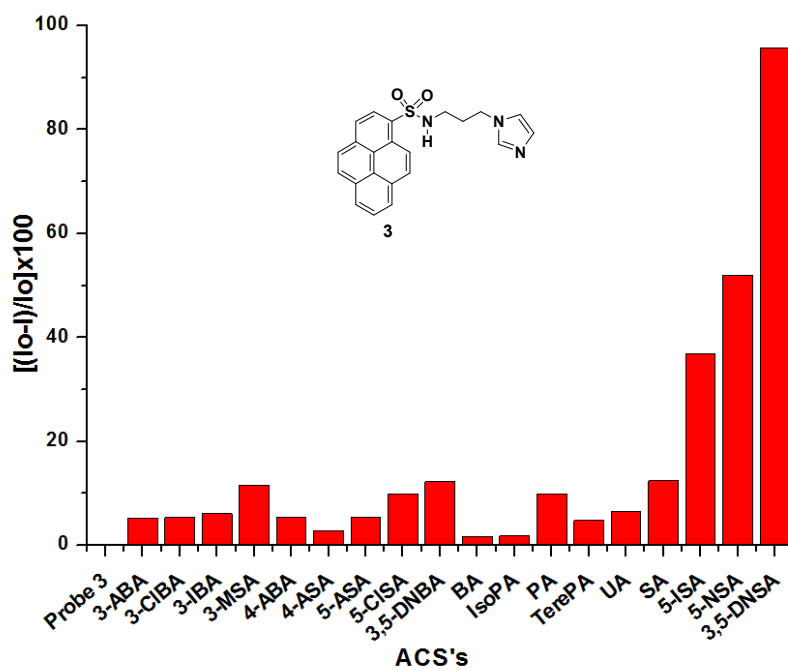

Fig. SI 4: Relative fluorescence intensity bar diagram of probe **3** (1  $\mu$ M, EtOH) with different aromatic carboxylic acids,  $\lambda_{ex} = 336$  nm.

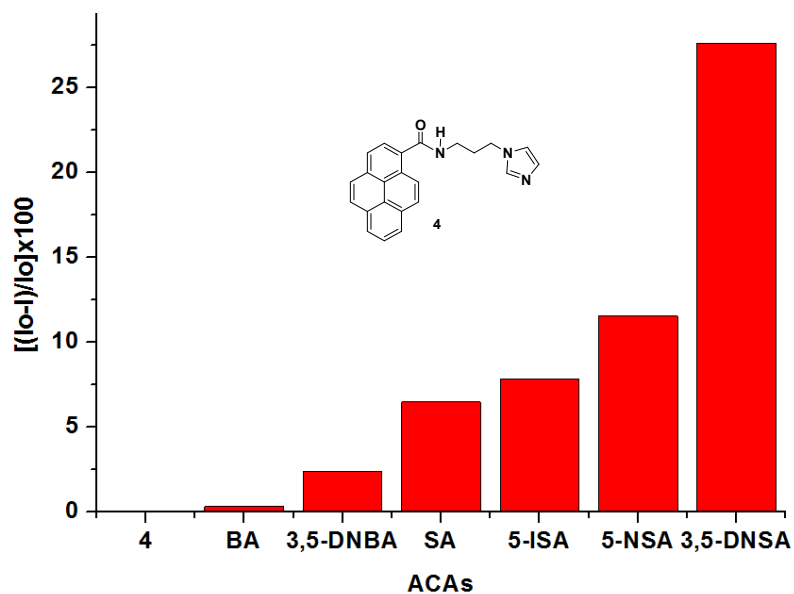

Fig. SI 5: Relative fluorescence intensity bar diagram of probe **4** (1  $\mu$ M, EtOH) with different carboxylic acids,  $\lambda_{ex}$  = 336 nm, slit width 3,3.

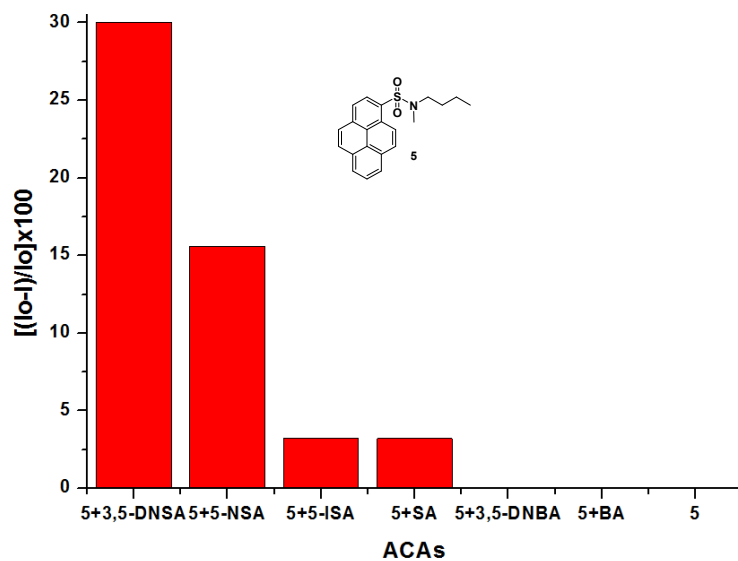

Fig. SI 6: Relative fluorescence intensity bar diagram of probe **5** (1  $\mu$ M, EtOH) with different carboxylic acids,  $\lambda_{ex}$  = 336 nm, slit width 3,3.

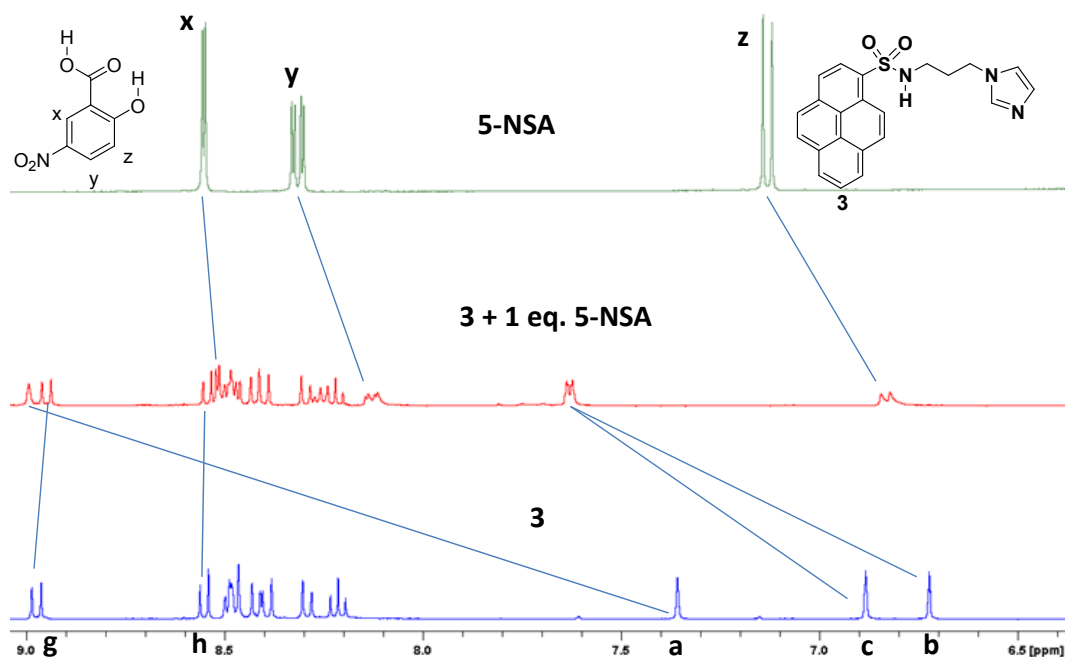

Fig. SI 7: Partial  $^1\text{H}$  NMR spectra of aromatic region of 5-NSA and probe **3** on addition of 1 eq. of 5-NSA in  $\text{DMSO-d}_6$ .

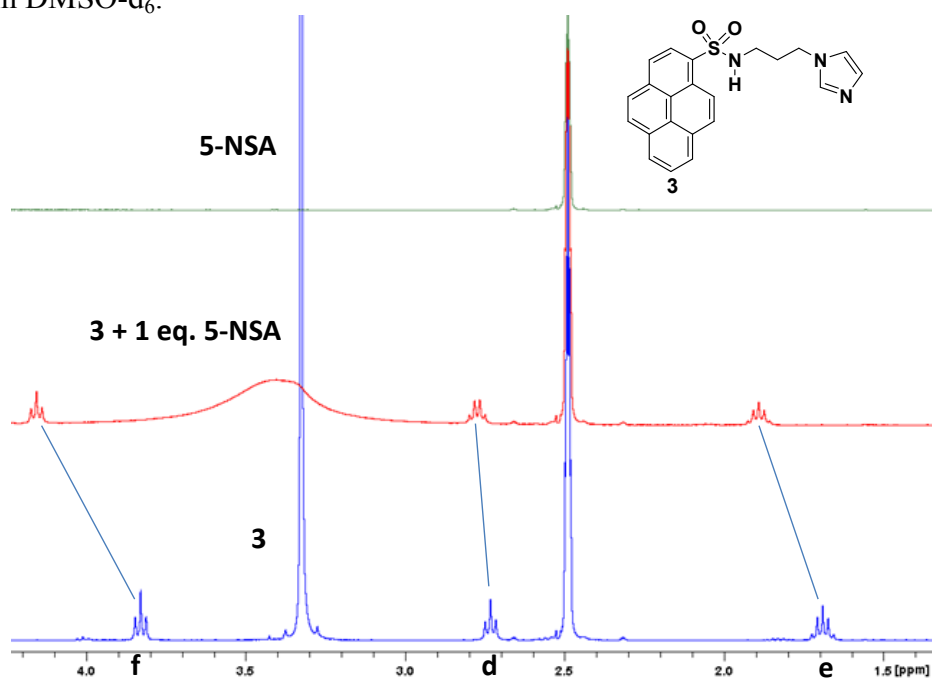

Fig. SI 8: Partial  $^1\text{H}$  NMR spectra of aliphatic region of 5-NSA and probe **3** on addition of 1 eq. of 5-NSA in  $\text{DMSO-d}_6$ .

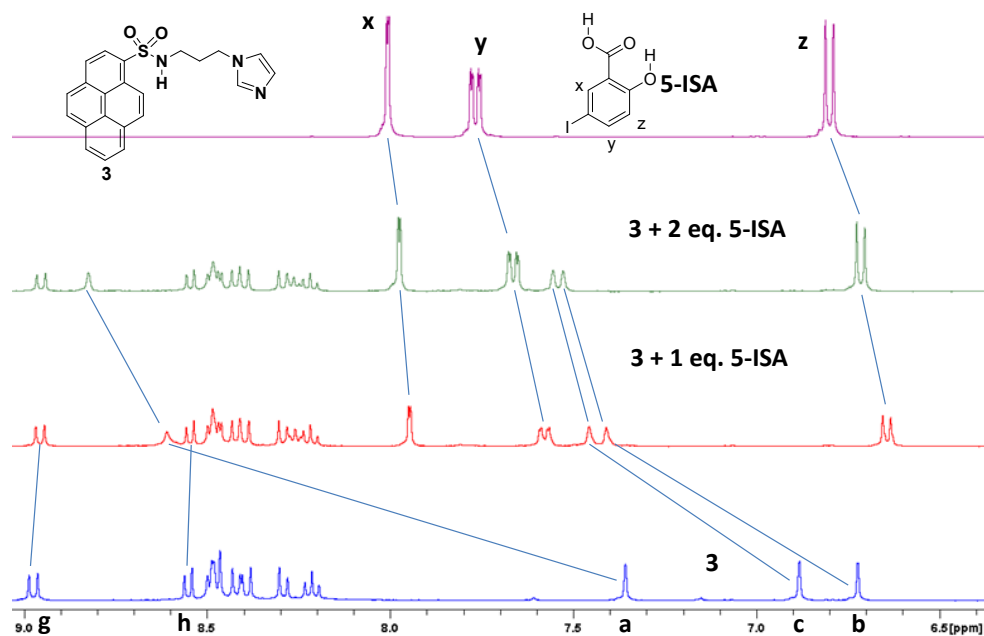

Fig. SI 9: Partial <sup>1</sup>H NMR spectra of aromatic region of 5-ISA and probe **3** on addition of 1 eq. of 5-ISA, 2 eq. of 5-ISA in DMSO-d<sub>6</sub>.

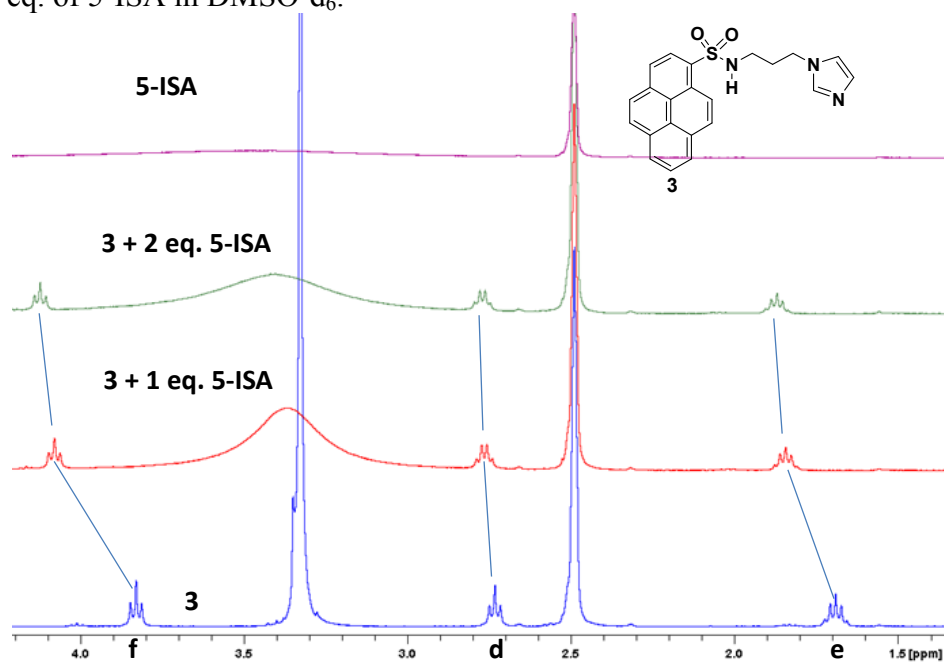

Fig. SI 10: Partial <sup>1</sup>H NMR spectra of aliphatic region 5-ISA and probe **3** on addition of 1 eq. of 5-ISA, 2 eq. of 5-ISA in DMSO-d<sub>6</sub>.

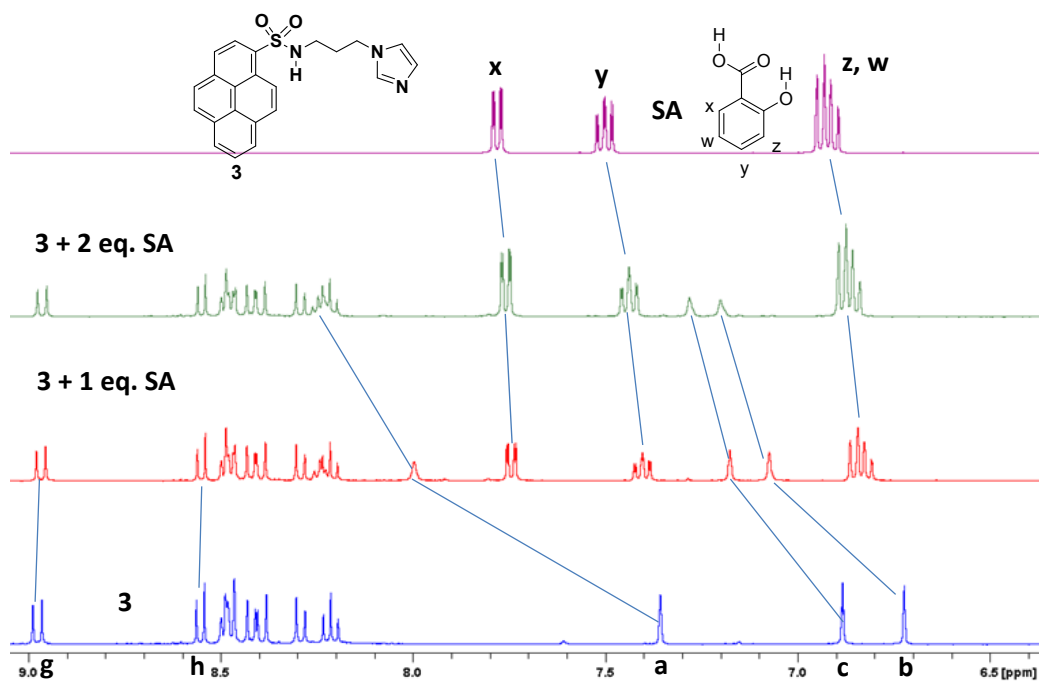

Fig. SI 11: Partial  $^1\text{H}$  NMR spectra of aromatic region of SA and probe **3** on addition of 1 eq. of SA, 2 eq. of SA in  $\text{DMSO-d}_6$ .

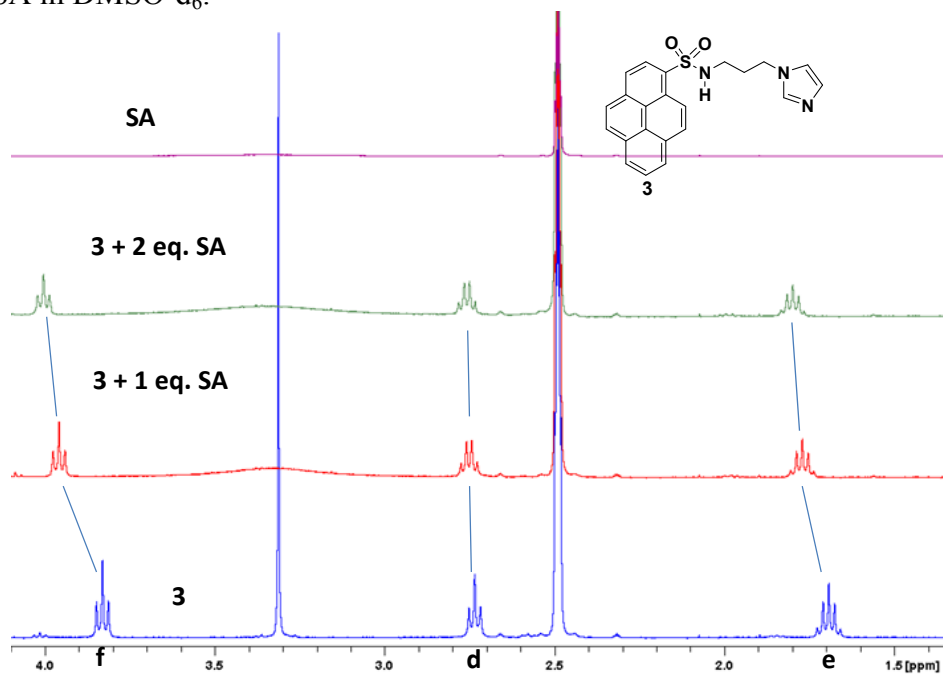

Fig. SI 12: Partial  $^1\text{H}$  NMR spectra of aliphatic aromatic region of SA and probe **3** on addition of 1 eq. of SA, 2 eq. of SA in  $\text{DMSO-d}_6$ .

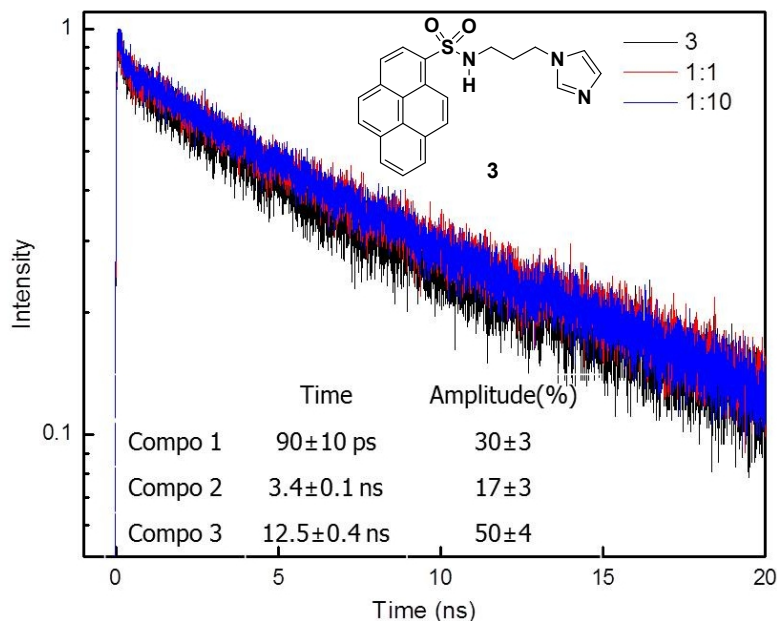

Fig. SI 13: The lifetimes of samples (Compo 1 = probe 3 (black), Compo 2 = 1:1 complex with 3,5-dinitrobenzoic acid (red) and Compo 3 = 1:10 complex with 3,5-dinitrobenzoic acid (blue)) are almost similar.

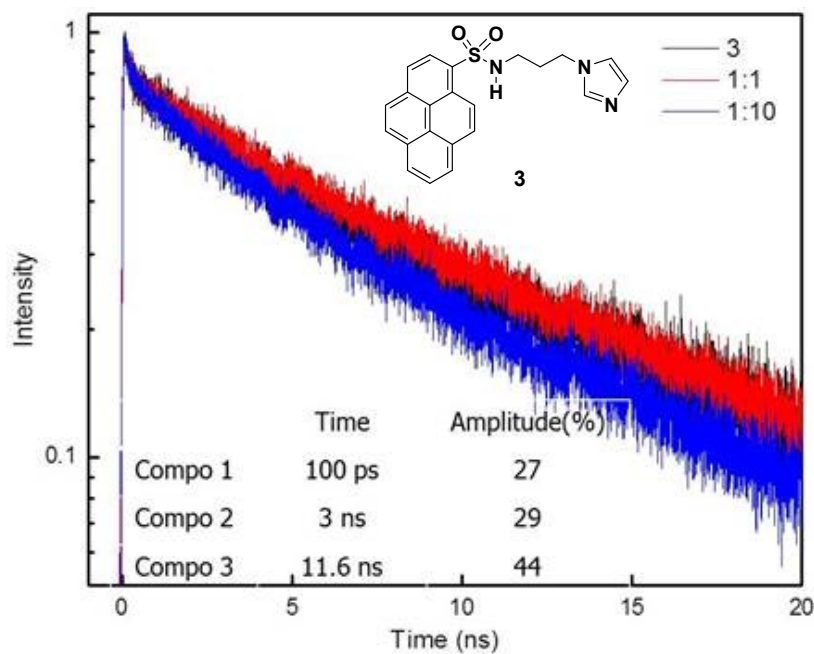

Fig. SI 14: The lifetimes of samples (Compo 1 = probe 3 (black), Compo 2 = 1:1 complex with 3,5-dinitrosalicylic acid (red) and Compo 3 = 1:10 complex with 3,5-dinitrosalicylic acid (blue)) are slightly different.



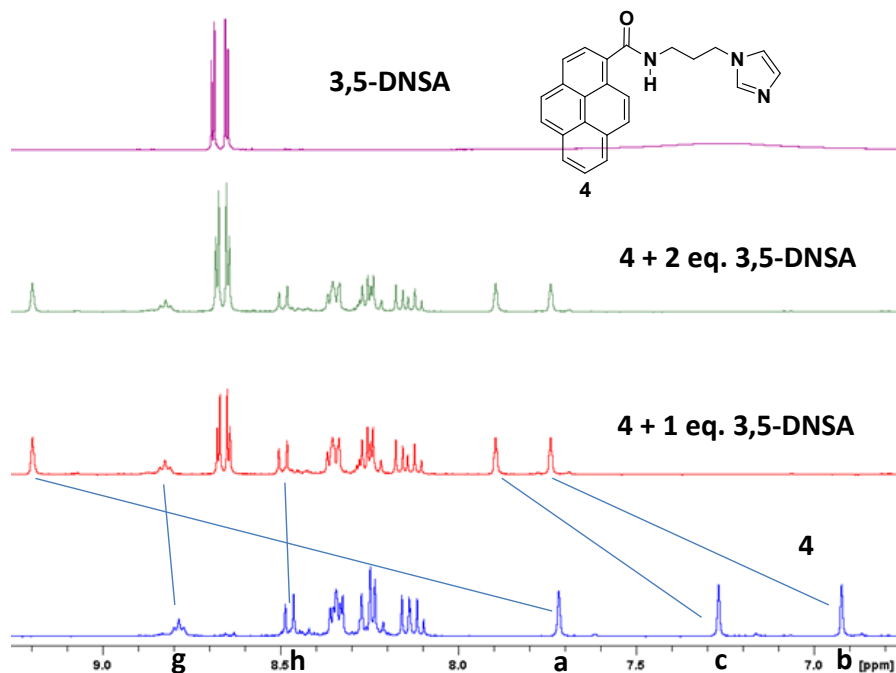

Fig. SI 15: Partial  $^1\text{H}$  NMR spectra of aromatic region of 3,5-DNSA and probe **4** on addition of 1 eq. of 3,5-DNSA, 2 eq. of 3,5-DNSA in  $\text{DMSO-d}_6$ .

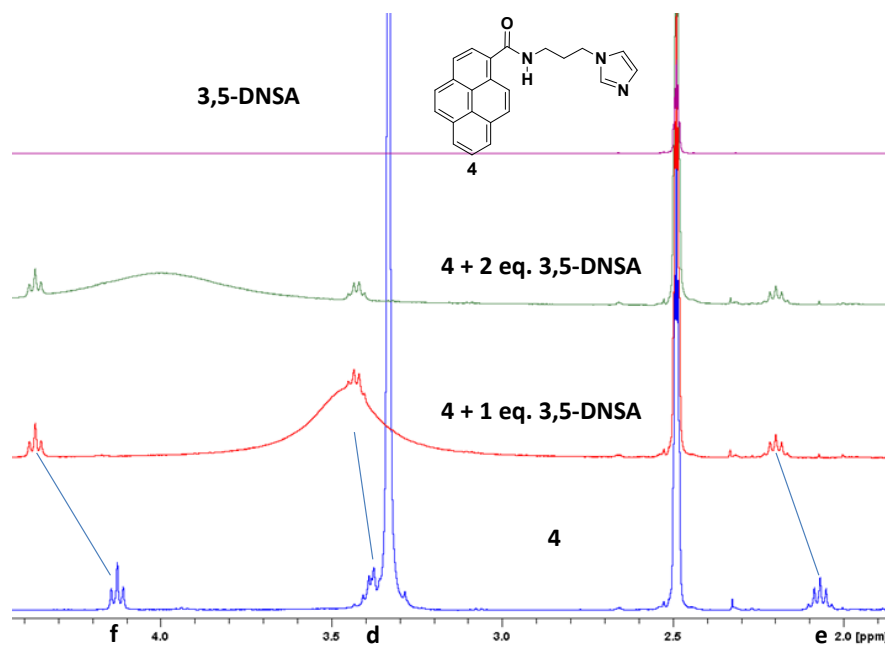

Fig. SI 16: Partial  $^1\text{H}$  NMR spectra of aliphatic region of 3,5-DNSA and probe **4** on addition of 1 eq. of 3,5-DNSA, 2 eq. of 3,5-DNSA in  $\text{DMSO-d}_6$ .

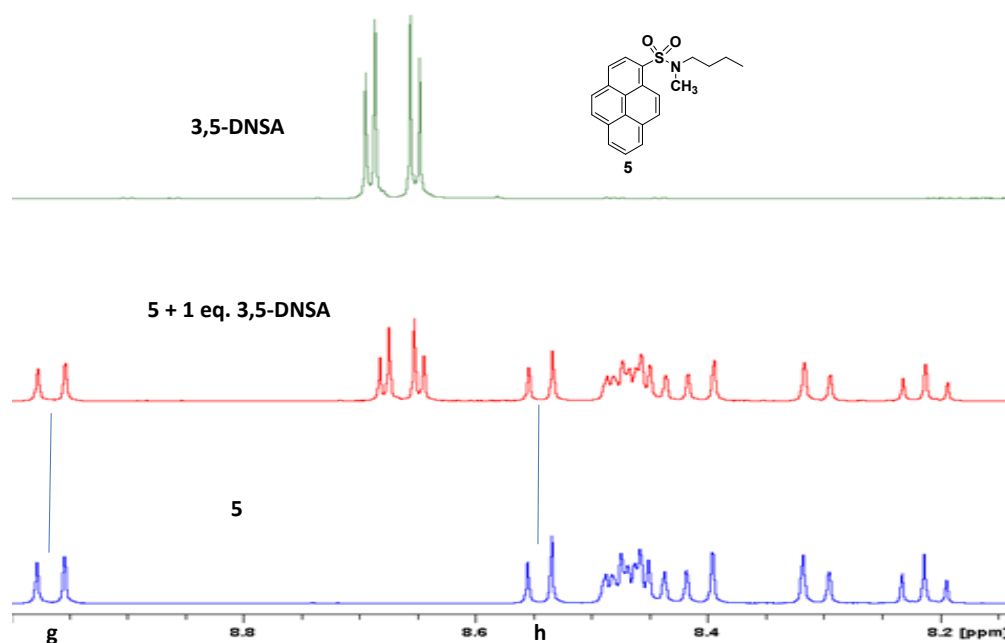

Fig. SI 17: Partial  $^1\text{H}$  NMR spectra of aromatic region of 3,5-DNSA and probe **5** on addition of 1 eq. of 3,5-DNSA in  $\text{DMSO-d}_6$ .

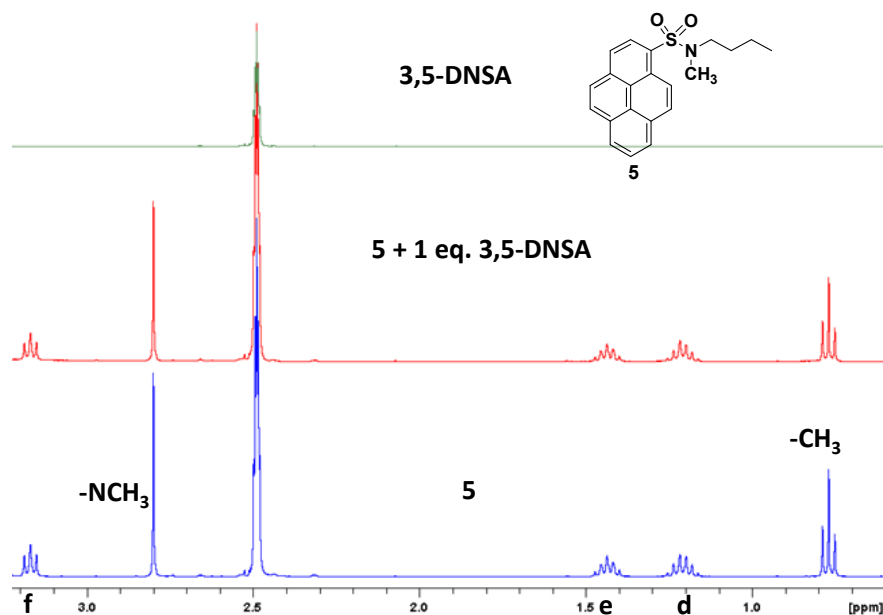

Fig. SI 18: Partial  $^1\text{H}$  NMR spectra of aliphatic region of 3,5-DNSA and probe **5** on addition of 1 eq. of 3,5-DNSA in  $\text{DMSO-d}_6$ .

SI Table 1: The contributions of each electronic oscillator (orbital transitions) to the lowest energy transition.

| Molecule/Complex   | State          | Absorption | Coefficient | $-\Delta E_{\text{HOMO/LUMO}}$ |
|--------------------|----------------|------------|-------------|--------------------------------|
| 5-NSA              | S <sub>4</sub> | H → L      | 0.95        | 4.391                          |
| 3,5-DNSA           | S <sub>6</sub> | H → L + 1  | 0.89        | 4.480                          |
| Probe 3            | S <sub>1</sub> | H → L      | 0.95        | 3.537                          |
| Probe 3 + 5-NSA    | S <sub>2</sub> | H → L      | 0.91        | 3.530                          |
| Probe 3 + 3,5-DNSA | S <sub>7</sub> | H → L + 2  | 0.95        | 3.518                          |

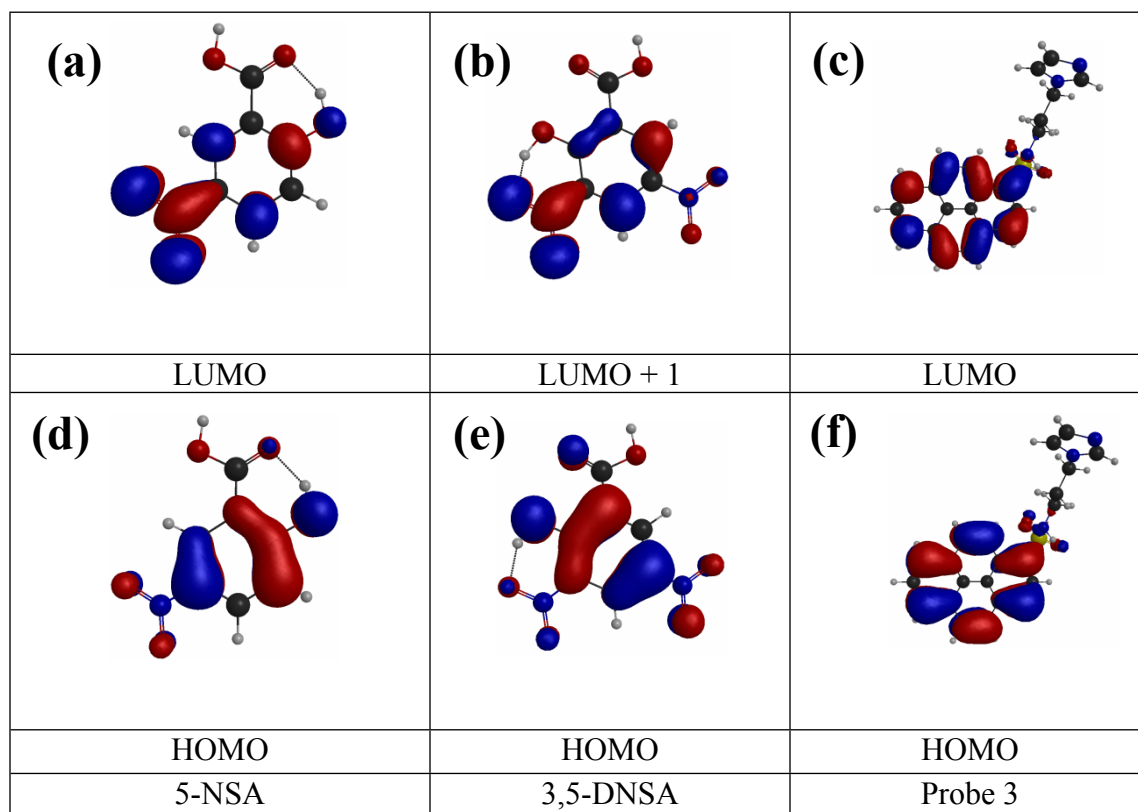

Fig. SI 19: B3LYP/6-31G\* calculated molecular orbitals of 5-NSA, 3,5-DNSA and probe 3.

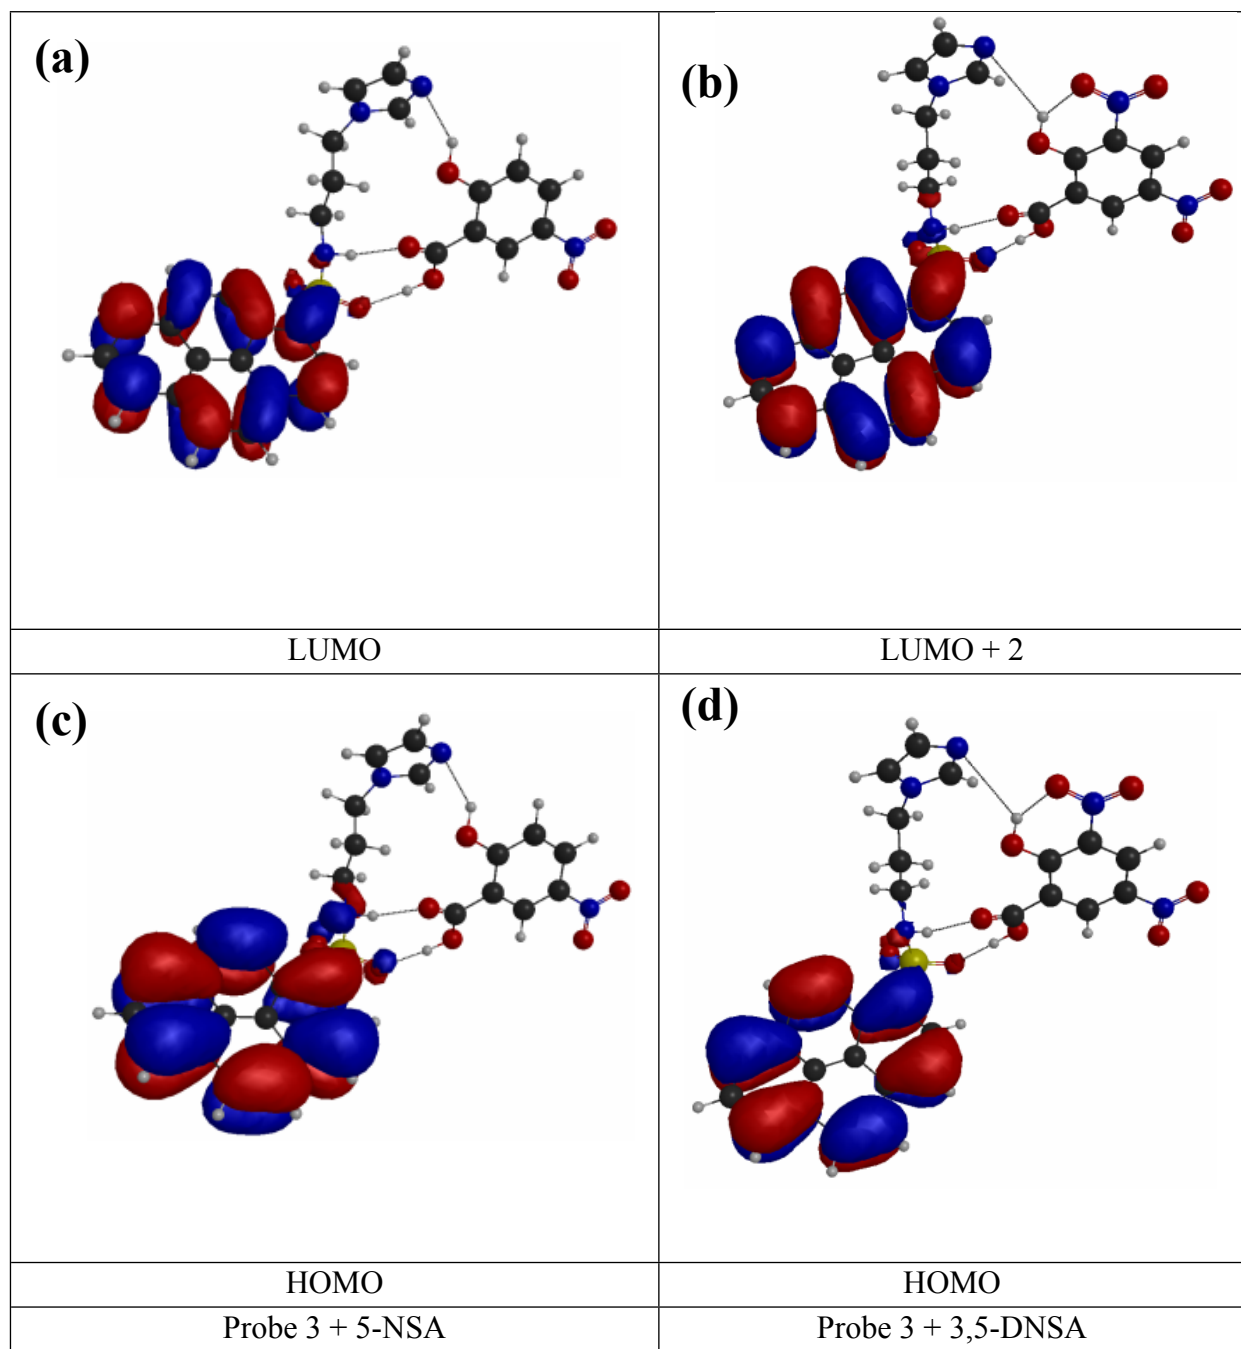

Fig. SI 20: B3LYP/6-31G\* calculated molecular orbitals of probe **3** + 5-NSA and probe **3** + 3,5-DNSA.

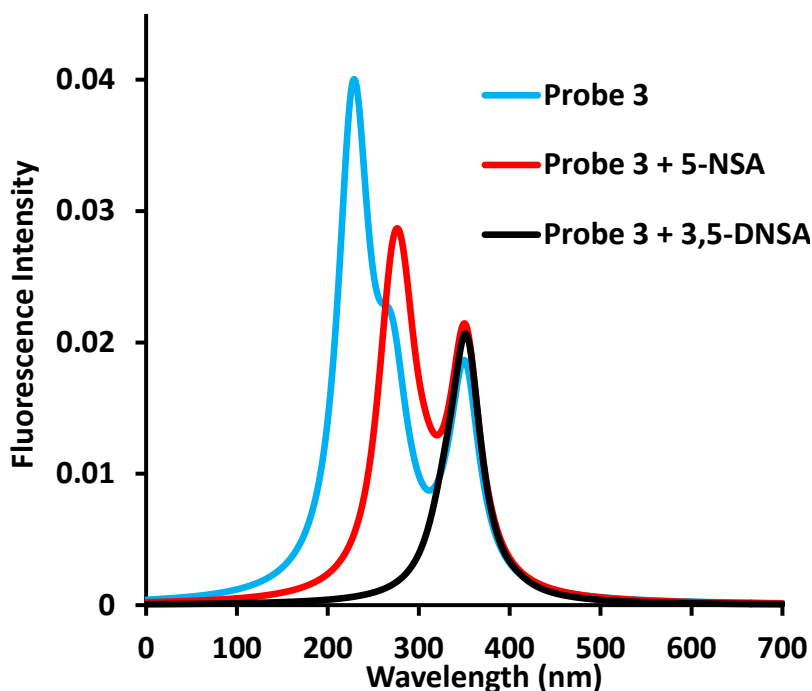

Fig. SI 21: Fluorescence emission spectra of probe **3** and its complexes with 3,5-DNSA and 5-NSA, obtained by using B3LYP/6-31G\*.

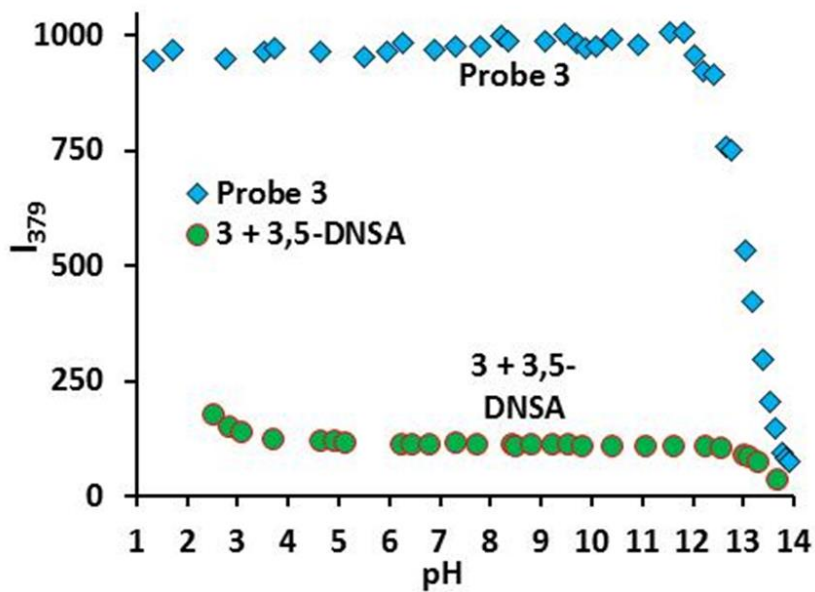

Fig. SI 22: Fluorescence intensity at  $\lambda_{max} = 379$  nm of probe **3** and [**3**•3,5-DNSA] (1  $\mu$ M, EtOH-H<sub>2</sub>O 10%) vs pH,  $\lambda_{ex} = 336$  nm, slit width 3,3.
